## **MST1R/RON and EGFR in a complex with syndecans sustain carcinoma S-phase progression by preventing p38MAPK activation**

DeannaLee M. Beauvais, Kristin Short, Noah Stueven, Scott E. Nelson, Denis Lee, Oisun Jung, Richard A. Anderson, Paul F. Lambert and Alan C. Rapraeger

Departments of Oncology and Human Oncology  
Wisconsin Institutes for Medical Research  
Carbone Cancer Center  
School of Medicine and Public Health  
University of Wisconsin-Madison

Corresponding author:

Alan C. Rapraeger, Ph.D.  
3053 Wisconsin Institutes for Medical Research  
University of Wisconsin-Madison  
1111 Highland Avenue,  
Madison, WI 53705

Ph. 608-262-7577  
FAX 608-262-7224  
Email: [rapraeger@humonc.wisc.edu](mailto:rapraeger@humonc.wisc.edu)

## ABSTRACT

Syndecan-4 (Sdc4) organizes a complex of receptors consisting of its homologue, Sdc2, the receptor tyrosine kinases EGFR and MST1R/RON, and the laminin-binding  $\alpha 3\beta 1$  and  $\alpha 6\beta 4$  integrins that depends on a docking site within its extracellular domain. A peptide mimetic of the extracellular docking site, synstatin-EGFR (SSTN<sub>EGFR</sub>), disrupts the receptor complex and prevents the invasion of non-transformed or carcinoma cells that relies on active EGFR. However, the peptide also prevents DNA replication that relies on active MST1R/RON and c-Abl kinase within the complex, resulting in rapid S-phase arrest of head & neck (HN) and breast carcinoma cells. SSTN<sub>EGFR</sub> does not affect DNA replication in non-transformed oral or breast epithelial cells, but it does block their EGF-dependent invasion. Although EGFR is required as a component of the complex, its kinase activity is not required to sustain S-phase progression in the carcinoma cells, perhaps explaining why many HN and breast carcinomas that overexpress EGFR are nonetheless refractory to EGFR inhibitors. The syndecan-organized receptor complex (Sdc:RTK:ITG complex) appears to suppress stress signals that would otherwise disrupt the replisome engaged in DNA synthesis. SSTN<sub>EGFR</sub>-treatment of carcinoma cells, or normal oral epithelial cells expressing stress-inducing HPV oncogenes, causes rapid activation of the p38 stress MAPK leading to loss of PCNA from the chromatin and cessation of DNA synthesis. This arrest is independent of the common DNA damage response (DDR) known to activate an S-phase checkpoint, revealing a novel arrest mechanism and a novel receptor complex that is activated on tumor cells to suppress stress-induced proliferation arrest.

## INTRODUCTION

The epidermal growth factor receptor (EGFR, HER1) has major roles in human cancer, including squamous cell carcinoma of the head & neck (HNC) and carcinoma of the breast, among others<sup>53, 54, 95</sup>. Traditional causes of HNC are smoking and alcohol consumption, but oropharyngeal tumors caused by human papilloma virus (HPV) infection are increasing dramatically in frequency<sup>101</sup> and are expected to become the predominant type of cancer caused by HPVs by the end of this decade<sup>22</sup>. EGFR, and its ligands (e.g., EGF, TGF $\alpha$ ), are overexpressed in up to 90% of HNC patients, regardless of cause<sup>20, 25, 93</sup>, are induced further by standard treatment regimens involving external beam radiation and DNA damaging agents<sup>30, 96, 126</sup>, and are strongly linked to tumor progression<sup>21, 87</sup>. EGFR is also a causal agent in triple negative breast cancer, a tamoxifen-resistant, highly malignant form that comprises 15-25% of breast cancers, often striking younger women<sup>19, 32, 38, 49, 51, 66, 68, 88</sup>. Nonetheless, EGFR inhibitors, including the EGFR-blocking antibody cetuximab or EGFR kinase inhibitors, have had disappointing outcomes in the clinic<sup>20, 48</sup>, suggesting alternative mechanisms through which EGFR promotes or sustains the progression of these cancers.

Work from a variety of laboratories has shown a link between the  $\alpha 6\beta 4$  integrin and EGFR in breast and other cancers<sup>37, 68</sup>. The  $\alpha 6\beta 4$  integrin was first identified as a tumor marker for both HNC and breast cancer and has more recently been linked to metastasis and recurrent disease<sup>18, 23, 34, 41, 61, 84, 108, 115, 117</sup>. This integrin in normal cells assembles with laminin in the basement membrane underlying basal epithelial cells as well as endothelial cells lining blood vessels, forming stable hemidesmosomes in which the long (ca. 1000 amino acid) cytoplasmic domain of the  $\beta 4$  subunit anchors to the keratin filament network in the cytoplasm of the cell<sup>52, 79, 115</sup>. In contrast to this “stabilizing” role, however, the integrin takes part in the invasion, proliferation and survival of tumors that overexpress the receptor tyrosine kinases HER2, EGFR, c-Met and MST1R/RON, including HNC and breast cancer that overexpress EGFR. Signaling from these kinases during wound healing or tumorigenesis causes the breakdown of hemidesmosomes, freeing the integrin to assemble with these kinases<sup>1, 10, 11, 13, 35, 39, 40, 70, 73, 94, 106, 107, 115</sup>. This leads to its tyrosine phosphorylation that converts it to a signaling scaffold<sup>65, 72, 116</sup> that binds Shc and IRS-1/2, and activates PI3K, Akt, Erk, Src family members, Rho GTPases and other signaling effectors necessary for proliferation, migration and survival<sup>29, 33, 72, 73, 98, 99, 115, 120, 49, 50</sup>. Complementing its expression in tumors, EGFR and  $\alpha 6\beta 4$  integrin are also expressed in endothelial

cells, especially those induced by tumors<sup>3, 16, 59</sup>. Thus, silencing expression of the  $\beta 4$  subunit or expressing a signaling defective  $\beta 4$  mutant in animal models of breast, prostate or skin cancer dramatically reduces tumorigenesis and/or tumor angiogenesis<sup>27, 44, 105, 122-80</sup>.

Recent work has shown that syndecans act as organizers of receptor complexes critical for cell invasion and survival, particularly in tumor cells<sup>6-8, 56, 89, 111, 112</sup>. These receptor complexes typically consist of a receptor tyrosine kinase (e.g., IGF-1R, EGFR, HER2, VEGFR2) and an integrin, captured via binding motifs in the syndecan extracellular domains<sup>6-8, 56, 89, 90</sup>. Because these docking sites are extracellular, peptides that mimic these binding motifs (called “synstatins” or “SSTNs”) effectively compete for assembly of the receptor complex and disrupt receptor signaling that is critical for tumor growth and tumor angiogenesis<sup>5-7, 17, 56, 74-76, 89, 90, 110-114</sup>. This body of work has revealed that the assembly of EGFR with the  $\alpha 6\beta 4$  integrin, and with the laminin-binding  $\alpha 3\beta 1$  integrin, is mediated by syndecan-4 (Sdc4)<sup>111, 112</sup>. A juxtamembrane site in the extracellular domain of Sdc4 (amino acids 87-131) couples the syndecan to EGFR and the  $\alpha 3\beta 1$  integrin<sup>112</sup>, coupling that is competitively blocked by a peptide mimetic called SSTN<sub>EGFR</sub><sup>112</sup>. This peptide blocks the EGF-stimulated migration of keratinocytes and mammary epithelial cells on laminin-332 (LN332, also called LN5) that the cells deposit as they migrate<sup>111, 112</sup>. The C-terminus of the Sdc4 cytoplasmic domain simultaneously captures the  $\alpha 6\beta 4$  integrin, an interaction that relies on a glutamate residue (E1729) near the tip of the  $\beta 4$  cytoplasmic domain<sup>111</sup>. Expression of a  $\beta 4^{E1729A}$  mutant in keratinocytes and mammary epithelial cells prevents the Sdc4 interaction and also blocks EGF-induced cell migration<sup>111</sup>.

In this study, we have questioned whether Sdc4, EGFR, and the  $\alpha 3\beta 1/\alpha 6\beta 4$  integrin complex has roles in HNC and breast carcinoma cells other than promoting their invasion. We have used SSTN<sub>EGFR</sub> to treat carcinoma cells *in vitro* and *in vivo*, and discover that the peptide rapidly induces a novel mechanism of S-phase cell cycle arrest in HNC and breast carcinoma cells. Remarkably, although the arrest mechanism relies on EGFR, it is independent of the EGFR kinase activity and is therefore unaffected by EGFR inhibitors. Instead, sustained progression through S-phase by the tumor cells depends on active macrophage stimulating-1 receptor (MST1R)/Recepteur d’Origine Nantais (RON) kinase<sup>92, 121</sup>, the Sdc4 homologue Sdc2<sup>81</sup>, and the cytoplasmic/nuclear kinase c-Abl<sup>42</sup>, which are incorporated into the Sdc4-organized receptor complex and are

also displaced by SSTN<sub>EGFR</sub>. However, the S-phase arrest is observed only in tumor cells, as the peptide has no effect on the proliferation of non-transformed oral or mammary epithelial cells. However, HPV16 E6 and/or E7 oncogenes, which can immortalize cells but are not sufficient to cause cells to be tumorigenic<sup>50, 58, 118</sup> convert oral epithelial cells to a SSTN-susceptible phenotype, indicating that preneoplastic and neoplastic carcinoma cells, but not normal epithelial cells, rely on the Sdc4-organized receptor complex to sustain their cell cycle progression in an EGFR kinase-independent manner.

## RESULTS

Our prior work has shown that the survival of SKBr3 breast carcinoma cells depends on a receptor complex in which the EGFR-family kinase HER2 and the laminin-binding  $\alpha 6 \beta 4$  and  $\alpha 3 \beta 1$  integrins are coupled by cytoplasmic and extracellular interactions to the matrix receptor Sdc1, contrasting with non-tumorigenic epithelial cells that rely on the receptor complex for migration during wound healing but not for survival<sup>111</sup>. We now question whether a similar tumor-specific mechanism is exhibited by a homologous receptor complex in which HER2 is replaced by the EGFR receptor tyrosine kinase and Sdc1 is replaced by Sdc4<sup>111, 112</sup>. The growth of non-tumorigenic oral, skin or breast epithelial cells was compared to a panel of carcinoma cells lines during a four-day treatment with SSTN<sub>EGFR</sub>, a peptide mimetic of the EGFR and  $\alpha 3 \beta 1$  integrin docking site in the extracellular domain of Sdc4 that competitively displaces these receptors from the syndecan<sup>112</sup>. Whereas the growth of non-tumorigenic normal oral keratinocytes (NOKs), human tonsillar epithelial cells (HTEs), HaCaT keratinocytes and MCF10A cells is not affected (**Fig. 1A**), HPV<sup>-</sup> or HPV<sup>+</sup> HNC cells (**Fig. 1B**) and triple-negative or HER2+ breast carcinoma cells (**Fig. 1C**) displayed significantly reduced growth in the presence of the peptide, which exhibited an IC<sub>50</sub> of approximately 3-10  $\mu$ M.

HPV is an increasingly abundant etiological factor in HNC due in large part to the activities of two virally encoded oncogenes E6 and E7, which have been shown to drive head and neck carcinogenesis *in vivo* when mice transgenic for these viral oncogenes are treated with an oral carcinogen<sup>55, 102, 103</sup>. Consistent with these viral oncogenes not being sufficient to cause cancer, human epithelial cells harboring HPV genomes or simply expressing these two oncogenes do not form tumors *in vivo*<sup>50, 58, 118</sup>. Thus, HPV infection is thought to induce a preneoplastic state, with cancers arising only after the accumulation of additional oncogenic insults. To test whether SSTN targets preneoplastic as well as neoplastic cells, we analyzed the effect of SSTN<sub>EGFR</sub> on the

growth of NOKs or HTEs that were transfected with the HPV16 E6 and/or E7 oncogenes, or infected with HPV18, finding that the introduction of oncogenes into these cells converts them to the SSTN-susceptible phenotype (**Fig. 1D**).

Overexpression of EGFR and/or its ligands is linked to poor prognosis in HN, lung, triple-negative breast and other carcinomas<sup>20, 48, 51, 66, 88</sup>. Despite this, EGFR inhibitors, including the EGFR-blocking antibody cetuximab, and EGFR kinase inhibitors erlotinib and gefitinib, among others, have had limited success in the clinic<sup>4, 20, 28, 48</sup>. Similarly, we find that our panel of HNC and triple-negative breast carcinoma cells, despite being highly susceptible to SSTN, are largely resistant to high concentrations of cetuximab (**Fig. 1E**), and are variably resistant to erlotinib (**Fig. 1F**). This contrasts with the SSTN<sub>EGFR</sub> peptide (**Fig. 1B, 1C**), potentially suggesting a distinct mode of action that depends on EGFR but not EGF ligand or EGFR kinase activity.

Analysis of cell surface receptor expression by flow cytometry demonstrates that all of the cell lines express the component receptors of the Sdc4-organized complex, although the HNC and breast carcinoma cells express 10-20-fold higher levels of EGFR and  $\alpha 6 \beta 4$  integrin than the non-transformed NOKs or HTEs (**Fig. 2A-C**). Interestingly, Sdc4 that is responsible for organizing this receptor complex is expressed at nearly undetectable levels in the NOKs and HTEs (**Fig. 2B, 2C**), cells that appear insensitive to the growth-inhibitory properties of SSTN<sub>EGFR</sub>. However, its levels increase when the NOK or HTE cells express the E6 and/or E7 oncogenes, along with increased expression of EGFR and the  $\alpha 3 \beta 1$  and  $\alpha 6 \beta 4$  integrins (**Fig. 2B, 2C**). This augmented expression of Sdc4 and its presentation at the cell surface is confirmed by western blot analysis of NOK or HTE cells expressing the E6/E7 oncogenes treated with trypsin to remove cell surface Sdc4 prior to cell lysis (**Fig. 2D**).

The therapeutic potential of peptides is often limited by their rapid destruction by proteases, especially exopeptidases, in the blood plasma and/or their rapid clearance and excretion<sup>109</sup>. However, SSTN<sub>EGFR</sub> is remarkably stable when incubated at 37°C for prolonged periods in human plasma and displays a half-life of ~ 42 hr in the plasma of mice following intravenous injection (**Fig. 3A, B**). The peptide reaches a steady state minimum of 3.2  $\mu$ M in the plasma with daily injections for 4 days, consistent with this half-life measurement (**Fig. 3C**). Furthermore, UM-SCC47 xenografts allowed to establish for 1 week in nude mice display ~ 70% reduced growth over the subsequent 4 weeks in the presence of systemic SSTN peptide (**Fig. 3D**).

While analyzing the response of UM-SCC47 cells to SSTN<sub>EGFR</sub> *in vitro* by time-lapse microscopy, we

observed that none of the treated cells undergo chromosome condensation, form metaphase plates or undergo cytokinesis in the presence of the peptide compared to untreated cells that actively divide to form new daughter cells (data not shown), suggesting that they undergo a cell cycle block prior to reaching M-phase. To examine this possibility, either non-transformed HaCaT keratinocytes or the UM-SCC47 HNC cells line were treated with SSTN<sub>EGFR</sub> for 3 or 16 hr, accompanied by incorporation of the deoxynucleotide analog 5-ethynyl-2'-deoxyuridine (EdU) into newly synthesized DNA for the last 45 min, and then analyzed by flow cytometry. HaCaT cells treated with the peptide show no significant change in the level of EdU incorporation into cells nor a change in the distribution of cells in G1, S or G2/M phases of the cell cycle (**Fig. 4A**). In contrast, the UM-SCC47 cells show dramatically reduced EdU incorporation already by 3 hr of treatment (**Fig. 4A**). Moreover, the percentage of cells in G2/M is dramatically reduced in agreement with our time lapse microscopy observation, whereas the percentage of cells in S-phase or G1 is relatively unchanged (**Fig. 4A**). However, it is possible that many of the cells with 2N content that are assigned to G1 are actually arrested in very early S-phase, especially after 16 hr of treatment, suggesting that carcinoma cells treated with the peptide when in early-, mid- or late-S-phase undergo a rapid arrest of DNA synthesis. To test this hypothesis, UM-SCC47 cells were subjected to a double-thymidine block to synchronize them at the G1/S interface, then released for 3 or 8 hr to proceed either into early or late S-phase prior to being treated with SSTN (**Fig. 4B**). Cells released for 3 hr, then chased for an additional 8 hr with vehicle alone appear to progress to late S-phase/G2/M, or pass through G2/M and enter G1, as shown by their 2N DNA content (**Fig. 4B**). However, cells released for 3 hr then chased for 8 hr with SSTN<sub>EGFR</sub> remain almost entirely in S-phase and show little or no EdU incorporation above background. Similarly, after an 8 hr release, the cells appear to be in late S-phase, and proceed almost totally to G1 when treated with vehicle alone for an additional 8 hr, whereas over half of the cells remain arrested in late S-phase if chased in SSTN<sub>EGFR</sub> (**Fig. 4B**). The remainder enter G1, suggesting that peptide-mediated arrest is not immediate and those cells nearing the end of S-phase at the time of peptide addition continue into G2/M and are no longer subject to arrest by the peptide.

Growth factor receptor signaling is typically required to bypass the G1/S “start” point of the cell cycle, but continued growth signaling is not required to sustain cell cycle progression once DNA synthesis has begun<sup>83</sup>. Mechanisms that do cause arrest at the S-phase checkpoint arise from activation of the DNA damage response (DDR), due to actual DNA damage or replicative stress<sup>36, 57</sup>. This activates p53 and/or checkpoint

kinases (e.g. Chk1 or Chk2) downstream of the DNA damage sensors ATM, ATR and DNA-PK leading to phosphorylation of regulatory factors, including the histone H2AX<sup>14,36,57</sup>. However, treatment of UM-SCC47 HNC or MDA-MB-231 breast carcinoma cells with SSTN even for 6 hr fails to activate Chk1 or Chk2, or cause phosphorylation of H2AX ( $\gamma$ H2AX), in contrast to the phosphorylation observed when the cells are treated with external beam radiation to induce DNA breaks or hydroxyurea to induce replicative stress that are known to activate the DDR (**Fig. 4C**)<sup>14</sup>. Similarly, the UM-SCC47 cells, which express wild-type p53<sup>15</sup>, appear to lose rather than stabilize p53 when treated with SSTN, in contrast with the induction of p53 by Actinomycin D-induced stress (**Fig. 4D**). MDA-MB-231 cells, which express abundant levels of mutant p53 that escapes MDM2-mediated degradation<sup>82</sup>, fail to alter p53 levels in response to either SSTN or Actinomycin D (**Fig. 4D**).

These findings suggest that the Sdc4:ITG:EGFR complex has a prominent role in the progression of preneoplastic and neoplastic epithelial cells through S-phase. To confirm this, we compared EdU incorporation in non-tumorigenic cells (NOKs and MCF10A), preneoplastic cells (NOKs expressing E6/E7 oncogenes) and either HN or breast carcinoma cells treated with SSTN<sub>EGFR</sub> for 1, 3, or 6 hr. As expected (cf. **Fig. 1**) the NOKs and MCF10A cells show no inhibition of DNA synthesis at any treatment time, including as long as 16 hr (data not shown), whereas the preneoplastic and neoplastic cells show a dramatic reduction in EdU incorporation even when pretreated with SSTN<sub>EGFR</sub> for as little as 1 hr. Note that EdU is added together with continued SSTN for 45 min following the initial 1, 3 or 6 hr pretreatment with SSTN (**Fig. 5A**).

A key feature of DNA synthesis is assembly of the replisome, organized by the trimeric PCNA sliding clamp that encircles the DNA strand and acts as a scaffold to assemble DNA polymerase and its regulatory proteins on the DNA<sup>69,78</sup>. PCNA loading occurs on thousands of sites that have been licensed throughout the genome during G1, including the licensing factors ORC, Cdc6, Cdt1, and the MCM2-7 complex<sup>12</sup>. To test whether the loading of PCNA or the assembly of the licensing complex depends on a signal from the Sdc4-organized receptor complex, UM-SCC47 cells were detergent-extracted following 3 hr treatment with SSTN<sub>EGFR</sub> and stained for the retention of MCM2 and PCNA on the insoluble chromatin fraction (**Fig. 5B**). As expected, SSTN causes the near complete loss of EdU incorporation (**Fig. 5B**). This is mirrored by loss of PCNA as well (**Fig. 5B**), whereas MCM2 staining appears unaffected. Similar staining is observed for ORC (data not shown), suggesting that PCNA loading/unloading is the target of the inhibitory signal rather than the



licensing complex. PCNA loss in the presence of SSTN extends to triple negative and HER2+ breast carcinoma cells, select HPV- (UM-SCC1) and HPV+ (UM-SCC47) HNC cells and preneoplastic NOKs expressing E6/E7 oncogenes (**Fig. 5C**), but not to non-transformed NOKs or MCF10A mammary epithelial cells (**Fig. 5C**), mirroring the block to EdU incorporation (**Fig. 5A**).

To examine which of the receptors in the Sdc4:ITG:EGFR complex is responsible for signaling that sustains the carcinoma S-phase progression, each of the component receptors was silenced in UM-SCC47 cells using transient (72 hr) siRNA treatment, resulting in >95% reduction in receptor expression (**Fig. 6A**). Regardless of which receptor was silenced (.g., Sdc4, integrin  $\alpha 3\beta 1$ , integrin  $\alpha 6\beta 4$  or EGFR), DNA synthesis was blocked by well over 90% (**Fig. 6A**).

We have shown previously that EGFR and the  $\alpha 3\beta 1$  and  $\alpha 6\beta 4$  integrin coupled to Sdc4 play a prominent role in the LN332-dependent migration of epithelial cells<sup>111, 112</sup>, which depends on stimulation with EGF to activate the EGFR, resulting in activation of the Src-family kinase Fyn and tyrosine phosphorylation of the long cytoplasmic tail of the  $\alpha 6\beta 4$  integrin tethered to the cytoplasmic domain of Sdc4<sup>29, 73</sup>. Revisiting this role in the context of oral epithelial and carcinoma cells, both NOKs and UM-SCC47 cells are observed to invade through LN332-coated filters in response to EGF, with little to no invasion observed under serum-free conditions if EGF is not added (**Fig. 6B, 6C**). Furthermore, SSTN<sub>EGFR</sub>, the EGFR kinase inhibitors erlotinib or gefitinib, or the Src-family kinase (SFK) inhibitor PP2 reduce cell invasion either to or below the levels observed when EGF is omitted (**Fig. 6C**). Invasion is also blocked by the  $\alpha 3\beta 1$  integrin blocking antibody P1B5, which prevents the integrin's interaction with LN332<sup>111</sup>. Although  $\alpha 6\beta 4$  integrin is also a LN332-binding integrin, mAb 3E1 that blocks this integrin does not block invasion, confirming our prior findings that although the presence of this integrin is required, its primary role is as a signaling component/scaffold and it's engagement with the matrix is not necessary<sup>111, 112</sup>. A series of other inhibitors that target MST1R/ RON, a c-Met family member<sup>92, 121</sup>, or p38MAPK, have no effect, whereas inhibition of the cytoplasmic/nuclear kinase c-Abl, known to be activated downstream of integrins<sup>63, 64</sup>, had a modest inhibitory effect (**Fig. 6C**).

To test whether kinase activation responsible for cell invasion is also required for tumor cell advancement through S-phase, UM-SCC47 cells were labeled with EdU while being treated with erlotinib, gefitinib, or PP2. Surprisingly, despite the loss of cell proliferation when EGFR expression is silenced (**Fig. 6A**), neither

inhibition of EGFR or SFKs prevent EdU incorporation in the UM-SCC47 cells (**Fig. 6D**). This prompted us to question the potential role of other kinases. MST1R/RON has been reported previously to associate with the  $\alpha 6 \beta 4$  integrin<sup>94, 123</sup>, and also to activate c-Abl in prostate cancer cells leading to tyrosine phosphorylation of PCNA<sup>124, 125</sup>. Using specific inhibitors to MST1R/RON or Abl kinase, we find that EdU incorporation (**Fig. 7A**) and PCNA retention on chromatin (**Fig. 7B**) is dramatically reduced in the preneoplastic NOK-E6/E7 cells and the HN and breast carcinoma cells, but not in the NOKs or MCF10A cells, duplicating what we find with SSTN<sub>EGFR</sub> treatment. This prompted us to test whether Sdc4 organizes additional receptors into the complex with EGFR. Indeed, probing Sdc4 immunoprecipitates from UM-SCC47 cells reveals that MST1R/RON, c-Abl and the Sdc4 homologue, Sdc2<sup>81</sup> also precipitate (**Fig. 7C**). MST1R/RON and c-Abl are active, as evidenced by pY1238/1239 and pY412 in the A-loops of their kinase domains, respectively, and pY245 in the SH2-kinase linker of c-Abl<sup>47, 121</sup>, suggesting that they are activated by their incorporation into the complex. The SSTN<sub>EGFR</sub> peptide, which mimics the extracellular docking site unique to Sdc4, displaces MST1R/RON, Abl kinase and Sdc2 from the complex, along with EGFR and the  $\alpha 3 \beta 1$  integrin (**Fig. 7C**). The  $\alpha 6 \beta 4$  integrin remains due to its docking to Sdc4 by its cytoplasmic domain<sup>111</sup>. Furthermore, the displacement of MST1R/RON and c-Abl by SSTN<sub>EGFR</sub> inactivates c-Abl (**Fig. 7D**), supporting the hypothesis that their incorporation into the complex causes their activation and generates the signaling that sustains S-phase progression.

Neoplastic cells are under oncogenic, oxidative, metabolic and genotoxic stress that sets them apart from non-tumorigenic cells<sup>14, 45, 46, 71</sup>. Our prior work has shown that yet another syndecan-organized receptor complex consisting of IGF-1R and the  $\alpha v \beta 3$  or  $\alpha v \beta 5$  integrin coupled via extracellular domain interactions to Sdc1 serves in tumor cells to suppress the activation of apoptosis signal-regulating kinase-1 (ASK1), a MAP3K responsible for the activation of Jun N-terminal kinase (JNK) leading to apoptosis<sup>8</sup>. To test the hypothesis that the Sdc4-organized receptor complex serves in a similar manner to suppress stress signals that might otherwise cause S-phase arrest, we probed an antibody array consisting of apoptotic markers with lysates of cells treated for 16 hr with SSTN<sub>EGFR</sub>. Among the changes noted in UM-SCC47 and SCC25 HNC cells, but not non-transformed HaCaT, NOK or MCF10A cells, was an upregulation of active p38 stress MAPK (p38MAPK) (**Fig. 8A**). Blot analysis of oral epithelia over a series of SSTN treatment time points ranging from 15 min to 16 hr confirm that the NOKs fail to activate p38MAPK in response to SSTN<sub>EGFR</sub>, but NOKs

expressing the E6/E7 oncogenes and HNC cells activate p38MAPK within 15 min of peptide addition, and the activation persists throughout the period examined (**Fig. 8B, 8C**). A similar finding is observed in breast carcinoma cells, in which p38MAPK is activated within 15 min in tumor cells but no activation is witnessed in non-tumorigenic MCF10A cells (**Fig. 8D**). Furthermore, UM-SCC47 HNC cells treated with SSTN<sub>EGFR</sub> in the presence of p38MAPK inhibitors, BIRB-796 (Doramapimod) or Losmapimod (GW856553X, SB856553, GSK-AHAB) - at concentrations sufficient to block its activation (**Fig. 8F**) - fail to arrest their DNA synthesis, as shown by EdU staining (**Fig. 8E**). This extends as well to each of the preneoplastic or neoplastic oral and breast cells, in which addition of p38MAPK inhibitors fully rescues the inhibitory effect of SSTN<sub>EGFR</sub> on DNA synthesis based on EdU incorporation (**Fig. 8G**).

## DISCUSSION

We have defined a novel signaling mechanism that sustains the proliferation of preneoplastic epithelial cells and HN and breast carcinoma cells. This mechanism builds on a previously described signaling complex organized by Sdc4 at the surface of migrating epithelial cells, comprised of the  $\alpha 3 \beta 1$  integrin and EGFR docked to a juxtamembrane site in the Sdc4 extracellular domain, and the  $\alpha 6 \beta 4$  integrin engaged with the Sdc4 cytoplasmic domain following its release from hemidesmosomes during the initiating steps of cell migration<sup>111, 112</sup>. Migration depends on active EGFR kinase and Fyn-mediated phosphorylation of the  $\beta 4$  integrin cytoplasmic domain, engaging signaling effectors that drive migration<sup>29, 33, 72, 73, 98, 99, 115, 120, 49, 50</sup>. We now show that additional components, namely, MST1R/RON, c-Abl and Sdc2 are components of the complex as well, although engaged in a different role. Whereas they have little or no role in cell invasion, they are critical for sustaining the proliferation of tumor cells or epithelial cells expressing oncogenes that put the cells under stress. The role of Sdc2 remains unexplored, but it may play an important role by bringing these new receptors to the complex, facilitated by its heterodimerization with Sdc4<sup>24</sup>. MST1R/RON has also been shown to form heterodimers with EGFR<sup>60, 85</sup>, potentially further stabilizing its incorporation into the receptor complex. When incorporated, both MST1R/RON and c-Abl are activated, providing the signaling necessary to suppress stress signaling. By carrying out this suppression, the syndecan-organized receptor complex prevents p38MAPK from phosphorylating unknown targets that cause the collapse of the replisome and cessation of DNA synthesis resulting in a novel S-phase arrest.

Cellular stress can cause arrest in all phases of the cell cycle. DNA damage or stressors that arrest replication (e.g., hydroxyurea) trigger the DDR, which activates ATM and ATR<sup>26, 36</sup> and their effector kinases Chk1 (ATR) and Chk2 (ATM). These kinases arrest DNA synthesis in S-phase - at least in part - by targeting the cdc25A phosphatase and preventing its activation of cyclin E/Cdk2 required to bypass the G<sub>1</sub>/S checkpoint, and cyclin A/Cdk2 necessary for DNA synthesis in S-phase<sup>100, 119</sup>. Also, Chk1 phosphorylates p21<sup>WAF1/CIP1</sup> to disrupt cyclin E/Cdk2, ATR reverses the degradation of p16<sup>INK4A</sup>, inhibiting cyclin D/Cdk4/6 and its phosphorylation of retinoblastoma protein (RB), arresting cells in G<sub>1</sub><sup>2</sup>. Chk2 targets CDC25B phosphatase, preventing its activation of cyclin B/Cdk2 and causing arrest in G<sub>2</sub>/M. These kinases also target p53, affecting both its stability and transcriptional activity<sup>86</sup>, leading to G<sub>1</sub> and G<sub>2</sub>/M arrest through its control of p21 and cdc25A phosphatase expression. Despite the utilization of this mechanism to activate the S-phase checkpoint by a wide variety of stressed or damaged cells, however, the S-phase arrest induced by disruption of the syndecan:receptor tyrosine kinase:integrin (Sdc:RTK:ITG) signaling complex appears to be distinct from the canonical DDR, as treatment with SSTN<sub>EGFR</sub> fails to activate Chk1, Chk2, or p53.

Increasing evidence suggests that p38MAPK and JNK stress kinases have significant roles in cell cycle arrest, whether caused by DNA damage or other types of stress (e.g., oncogenic stress, metabolic stress)<sup>43, 67, 97</sup>. Targets of p38MAPK and/or JNK include: (i) the aforementioned stabilization of p53, (ii) MAPK-activated protein kinase 2 (MAPK-APK2 or MK2) that targets and inactivates the cdc25A phosphatase, thus inducing G<sub>1</sub> and S-phase arrest<sup>91</sup>, and (iii) phosphorylation of Cdt1, a critical licensing factor that, together with cdc6 and the histone deacetylase HB01, mediates the assembly of the minichromosome maintenance complex (MCM) at origins of replication during G<sub>1</sub>, thus completing origin licensing necessary for cells to progress into S-phase<sup>9, 43, 77</sup>. In contrast to these outcomes, however, the rapid, p38MAPK-dependent loss of PCNA from sites of replication when tumor cells are treated with SSTN<sub>EGFR</sub>, despite the apparent retention of MCM2 as a marker for of the licensing complex to which it binds, suggests that the p38MAPK target is part of the replisome. PCNA is a homotrimeric sliding clamp that acts as a scaffold for the replication machinery, including DNA polymerase  $\delta$  and  $\epsilon$ , cyclin A/CDK2, GADD45, p21<sup>CIP1/WAF1</sup>, and other regulatory proteins<sup>69, 78, 62</sup>. The loading/unloading of PCNA is regulated by the replication factor-C complex (RF-C); the largest of its five subunits, RF-Cp145, is phosphorylated by CDK2 when activated by cyclins, especially cyclin B in G<sub>2</sub>/M that causes release of PCNA from the DNA at the culmination of S-phase. But, whether it could also be

a target of p38MAPK during S-phase is not known. Intriguingly, phosphoproteomic screening indicates that PCNA itself is phosphorylated on S72 (FFRLSPKDSE)<sup>31</sup> in a consensus site potentially recognized by stress MAPKs and an area of future examination.

Normal oral and breast epithelial (e.g., non-transformed) cells are refractory to SSTN-induced S-phase arrest, whereas they become susceptible if expressing HPV oncogenes. They also upregulate expression of the complex components, especially the organizer, Sdc4, suggesting a feedback mechanism in response to the oncogenes. We suggest that this is a response to cellular stress in response to E6 and E7 expression (see model, **Fig. 8H**). Another response to this stress is activation of p38MAPK, destined to arrest the cells in S-phase by displacing PCNA from the DNA, a response that is prevented by the upregulated Sdc:RTK:ITG complex. The fact that non-transformed epithelial cells fail to arrest is likely due to the fact that they are not under the sustained stress that transformed cells experience.

The signaling mechanism that suppresses the stress signal appears to depend on MST1R/RON and c-Abl. MST1R/RON, and its family member c-Met, have been shown to associate with the  $\alpha 6\beta 4$  integrin<sup>94, 123</sup>, although whether the interaction is direct or through other receptors such as the complex described here is not clear. Because inhibition of either MST1R/RON or c-Abl causes the S-phase arrest, it is likely that c-Abl is activated by MST1R/RON, as has been shown in other cancers<sup>125</sup>. However, the target of c-Abl that restricts p38MAPK activation, presumably an upstream enzyme, remains unknown. It is interesting to note that PCNA itself is phosphorylated on Y211 by c-Abl<sup>124</sup>, and reportedly by nuclear EGFR as well, protecting PCNA from proteasome-mediated degradation<sup>56, 78, 79, 88</sup>. Although blockade of such phosphorylation when c-Abl activation is blocked by SSTN<sub>EGFR</sub> is unlikely to explain p38MAPK-mediated S-phase arrest that we observe, it may well be an additional outcome of c-Abl activation by the Sdc:RTK:ITG complex.

## MATERIALS AND METHODS

**Reagents.** SSTN<sub>EGFR</sub> peptide obtained from LifeTEIN LLC (Hillsborough, NJ) was reconstituted in DMEM (Life Technologies, Grand Island, NY) containing 50 mM HEPES (Millipore-Sigma, Burlington, MA) for *in vitro* studies, or HEPES-buffered 0.9% saline for use *in vivo*.

Monoclonal antibody (mAb) against human Sdc4 (F94-8G3) was graciously provided by Drs. Guido David and Pascale Zimmerman (University of Leuven, Belgium and Centre de Recherche en Cancérologie de Marseille, France), integrin  $\alpha 6\beta 4$  (3E1) was obtained from the Memorial Sloan-Kettering Monoclonal Antibody Core Facility (New York, NY) and integrin  $\alpha 3\beta 1$  (P1B5) from Millipore-Sigma. Mouse mIgG1 and mIgG2b isotype controls and mAb EGFR.1 were from BD Biosciences (San Jose, CA). Western blotting primary antibodies include: goat polyclonal human Sdc4 (AF2918, 0.5  $\mu\text{g/mL}$ ), EGFR (AF231, 1  $\mu\text{g/mL}$ ) and total MST1R/RON kinase (AF691, 1  $\mu\text{g/mL}$ ); rabbit polyclonal pY1238/1239 MST1R/RON (AF1947, 1  $\mu\text{g/mL}$ ) and mouse human ITGB4 mAb 422325 (1  $\mu\text{g/mL}$ ) from R&D Systems (Minneapolis, MN); rabbit polyclonal ITGA3 (1:250) from Novus Biologicals (Littleton, CO); rabbit mAbs 73E5 (c-Abl pY245, 1  $\mu\text{g/mL}$ ), 247C7 (c-Abl pY412, 1  $\mu\text{g/mL}$ ), D13E1 (total p38MAPK, 1:1000), .11H10 (tubulin, 1:1000), 133D3 (pS345-CBK1, 1:1000), rabbit polyclonal pT68-CBK2 (2661S, 1:1000) and pT183/Y185 p38MAPK mouse mAb 28B10 (1:2000) from Cell Signaling Technology (Danvers, MA); mouse mAbs 8E9 (total c-Abl, 1  $\mu\text{g/mL}$ ) and TU-01 (tubulin, 1:1000), and rabbit polyclonal Sdc2 (1  $\mu\text{g/mL}$ ) from Invitrogen/ThermoFisher Scientific (Rockford, IL); p53 mouse mAb DO-1 (1:750) from Santa Cruz Biotechnology (Dallas, TX) and mouse mAbs from Millipore-Sigma, JBW301 (pS139- $\gamma$ H2AX, 1:1000) and AC-74 ( $\beta$ -actin, 1:5000). Secondary antibodies for Western blotting include IRDye 680LT and 800CW goat anti-mouse IgG and goat anti-rabbit IgG (1:15,000, LI-COR Biosciences (Lincoln, NE), Alexa546 goat anti-rabbit and anti-mouse IgGs (1:5000, Invitrogen/ThermoFisher Scientific), alkaline phosphatase (AP)-conjugated donkey anti-goat, anti-rabbit and anti-mouse IgGs (1:5000, Jackson ImmunoResearch, West Grove, PA). Antibodies for indirect immunofluorescence (IF) include : PCNA rabbit mAb D3H8P (0.2  $\mu\text{g/mL}$ , Cell Signaling Technology), polyclonal MCM2 antibody (0.5  $\mu\text{g/mL}$ , Bethyl Laboratories, Montgomery, TX) and whole IgG (Jackson ImmunoResearch) followed by an Alexa546 goat anti-rabbit IgG secondary. Normal goat serum (VWR, Radnor, PA) diluted to 10% v/v in 1x CMF-PBS (pH 7.4) was used for IF blocking.

EGFR kinase inhibitors (erlotinib and gefitinib), MST1R/RON inhibitor BMS-0777607 and p38MAPK inhibitors (BIRB-796 and Losmapimod) were obtained from Selleck Chemicals (Houston, TX). EGFR-

inhibitory antibody cetuximab was kindly provided by Dr. Paul Harari (University of Wisconsin-Madison). SFK inhibitor (PP2) and its paired inactive analogue (PP3), as well as the MST1R/RON inhibitor CAS 913376-84-8 were from Millipore-Sigma. Abl kinase inhibitors (GNF5 and PPY-A) were acquired from R&D Systems. EdU (5-Ethynyl-2'-deoxyuridine) and Click-IT EdU-labelling reagents (1.3 mM THPTA/CuSO<sub>4</sub> mix, 20  $\mu$ M AF488 picolyl azide, and 2.5 mM ascorbic acid) were from Click Chemistry Tools (Scottsdale, AZ) and Millipore-Sigma (CuSO<sub>4</sub> and ascorbic acid). DDR stimulators (actinomycin D and hydroxyurea) and propidium iodide (PI; used to measure DNA content) were obtained from Millipore-Sigma. Human recombinant EGF was from Peprotech (Rocky Hill, NJ). CellTiter-GLO for quantifying cell numbers in proliferation assays was from Promega (Madison, WI).

**Cell culture.** All cells were cultured at 37°C and 92.5% air/7.5% CO<sub>2</sub>. HaCaT normal human epidermal keratinocytes were kindly provided by Dr. Peter LaCelle (Roberts Wesleyan College, NY). Human normal oral keratinocytes (NOKs) and normal human tonsillary epithelial cells (HTEs) transduced with or without HPV oncogenes were kindly provided by Dr. Paul Lambert (UW-Madison). MCF10A immortalized human mammary epithelial cells, triple-negative human mammary carcinoma cells MDA-MB-231 and MDA-MB-468, SKBr3 (HER2+) human mammary carcinoma cells and SCC25 and UPCI-SCC90 human HNC cells were obtained from ATCC (Manassas, VA). UM-SCC47, UM-SCC1, and UM-SCC6 HNC cells were from Millipore-Sigma. TU-138 and UD-SCC2 HNC were kindly provided by Dr. Randy Kimple (UW-Madison). All HNC cells were authenticated by STR profile through Genetica LabCorp (Burlington, NC). NOKs and HTEs were cultured in complete Keratinocyte Serum-Free (KSFM) medium containing 100 units/mL penicillin and 100  $\mu$ g/mL streptomycin (Life Technologies). All other cell lines were cultured as described previously<sup>6-8, 112</sup>. All cell lines were routinely screened for mycoplasma through the UW Small Molecule Screening Facility (SMSF) within the UW Carbone Cancer Center (UWCCC) Drug Development Core (DDC).

**Flow cytometry.** To measure cell surface Sdc4, integrin and EGFR expression levels, suspended cells were incubated for 1 hr on ice with 1  $\mu$ g of primary antibody per  $3 \times 10^5$  cells, washed, counterstained with Alexa-488-conjugated goat secondary antibodies and scanned on a ThermoFisher Attune NxT bench top cytometer.



Cell scatter and PI staining profiles were used to gate live, single-cell events for data analysis. For cell cycle analysis, asynchronous or synchronous (double thymidine block: 2 mM thymidine for 24 hr, 12 hr release in normal, complete culture medium followed by an additional 24 hr 2mM thymidine block) were cultured in the presence or absence of 30  $\mu$ M SSTN<sub>EGFR</sub> for 3, 8 (after release of the cells from the double thymidine block) or 16 hr. Cells were labelled with 100  $\mu$ M EdU for the last 45 min of each SSTN incubation period prior to the cells being suspended, fixed in 4% EM-grade paraformaldehyde (PFA, ThermoFisher Scientific) and permeabilized in a buffer containing 1x CMF-PBS (pH 7.4), 0.5% saponin and 1% BSA (Millipore-Sigma). Cells were first stained using a Click-IT EdU-labelling reaction for 1 hr (1.3 mM THPTA/CuSO<sub>4</sub> mix, 20  $\mu$ M AF488 Picolyl Azide and 2.5 mM Ascorbic Acid in permeabilization buffer) followed by PI staining for 1.5 hr (20  $\mu$ g/mL in the presence of 200  $\mu$ g/mL DNase-free RNase A (ThermoFisher Scientific) in permeabilization buffer). Cells were then analyzed by flow cytometry to assess levels of active DNA synthesis (AF488-EdU staining; Ex: 488 nm, Em: 530/30) and DNA content (PI staining; Ex: 561 nm, Em: 586/15) on a BD Biosciences LSR Fortessa bench top cytometer. Flow cytometry data acquisition and analysis were conducted at the UWCCC Flow Cytometry Laboratory Core.

**Immunoprecipitations and Western Blotting.** Immunoprecipitation of the Sdc-RTK:ITG complex in the presence or absence of competing SSTN<sub>EGFR</sub> peptide was carried out using 10  $\mu$ g/mL Sdc4 mAb F94-8G3 (or Mouse IgG1 as an isotype-matched, negative control), GammaBind PLUS Sepharose (GE Healthcare Life Sciences, Piscataway, NJ) and 1 mg of pre-cleared whole cell lysate (WCL)/sample in the presence of protease and phosphatase inhibitors as previously described<sup>6,8</sup>. Immuno-isolated complexes were then enzymatically digested in 50  $\mu$ L of heparitinase buffer (50 mM HEPES, 50 mM NaOAc, 150 mM NaCl, 5 mM CaCl<sub>2</sub>, pH 6.5) containing 4 x 10<sup>-3</sup> IU/mL heparinase I and heparinase III (Syd Labs, Malden MA) and 0.1 conventional units/mL chondroitin ABC lysase (Millipore-Sigma) for 4 hr at 37°C (with fresh enzymes added after 2 hr) to remove the glycosaminoglycan (GAG) side chains, which is required to resolve the syndecan core proteins as a discrete bands by electrophoresis. To resolve Sdc4 from WCLs, 100  $\mu$ g total protein was methanol-precipitated and then enzymatically digested with GAG lyases as described above. For p38MAPK and DDR effector blots, equal amounts of total protein (20-40  $\mu$ g depending on the target protein and cell line being probed) - determined using the Pierce A660nm Protein Assay kit with Ionic



Detergent Compatible Reagent (ThermoFisher Scientific) for SDS-PAGE sample buffer (lacking bromophenol blue) WCLs - were loaded per lane. All samples were resolved on 10% Laemmli gels prior to transfer to Immobilon-FL PVDF (Millipore-Sigma). Visualization of immunoreactive bands was performed using ECF reagent (for AP-conjugated secondary antibodies only) or direct excitation of fluorescent secondary antibodies on either a GE Healthcare Life Sciences Typhoon Trio (UWCCC Shared Equipment) or a LI-COR Odyssey Fc Imaging System (Department of Human Oncology, UW-Madison).

**siRNA design and transfection.** *Silencer Select* control (AM4635) and target-specific siRNA oligos directed against human Sdc4 (siRNA ID# 12434; Target Sequence: <sup>197</sup>(ca)GGAATCTGATGACTTTGAG<sup>217</sup>, GenBank Accession number NM\_002999.2), ITGB4 (siRNA ID# s7584; Target Sequence: <sup>789</sup>GCGACTACACTATTGGATT(tt)<sup>807</sup>, GenBank Accession Number NM\_001005731.2), ITGA3 (siRNA ID# s7543; Target Sequence: <sup>1168</sup>GGACTTATCTGAGTATAGT(tt)<sup>1186</sup>, GenBank Accession Number NM\_002204.3) and EGFR (3'UTR Target Sequence: <sup>4899</sup>GCTGCTCTGAAATCTCCTT<sup>4917</sup>, GenBank Accession Number NM\_005228.4) were acquired from Life Technologies. UM-SCC47 cells (0.35 x 10<sup>6</sup> per 35 mm well) were transfected with 100 nM siRNA using Lipofectamine RNAiMAX and Opti-MEM I transfection medium (from Life Technologies) at 1:1 ratio (μg siRNA:μL RNAiMAX). At 6 hr post-transfection, the wells were supplemented with 10% FBS and 3 mL of complete growth medium. At 24 hr post-transfection, the cells were suspended and plated on either acid-etched 18mm-#1 glass coverslips in 12-well plates or in 60mm tissue culture plates. Cells were then harvested at 72 h post-transfection and analyzed by Western blot (for receptor expression levels loading equal cell equivalents per sample) or AF488-EdU staining (for active DNA synthesis).

**Cell proliferation assays.** Cells (1-2x 10<sup>3</sup>/well) were plated in 96-well plates in complete culture medium in the presence or absence of SSTN<sub>EGFR</sub> peptide or EGFR kinase inhibitors for 72 hr. Cell numbers were measured using CellTiter-GLO against a standard curve in accordance with the manufacturer's instructions.

**Transwell Filter Invasion Assays.** The bottom polycarbonate filter surface of Transwell inserts (8  $\mu\text{m}$  pores; Corning #3422) were coated with 10  $\mu\text{g}/\text{ml}$  of LN332 (Kerafast, Boston, MA) diluted in 1x CMF-PBS (pH 7.4) for 3 hr at 37°C. NOKs or UM-SCC47 cells ( $5 \times 10^4$ ) suspended in serum-free medium containing 1% heat-denatured BSA were plated in the upper insert chamber with or without 10 ng/ml EGFR and indicated inhibitors (**Figs. 6B and C**). Cells were allow to migrate/invade for 16 hr at 37°C in the tissue-culture incubator. Cells on the bottom of the filter were then fixed with 4% PFA and stained with 0.1% Crystal Violet (in ddH<sub>2</sub>O). Five random fields from duplicate inserts were imaged and quantified for each treatment condition.

**Immunofluorescence.** Cells were plated on acid-etched 18mm-#1 glass coverslips in 12-well plates overnight and then treated with or without SSTN<sub>EGFR</sub> peptide in the presence or absence of the indicated inhibitors (**Figs. 6D, 7A and B, 8E and G**) for 1, 3, or 6 hr. For EdU labelling, cells were incubated with 100  $\mu\text{M}$  EdU in the last 45 mins of the treatment incubation period. The cells were fixed in 4% PFA, permeabilized in 0.5% Triton X-100 (Promega) in 1x CMF-PBS (pH 7.4) and blocked for 1 hr at room temperature in a 3% BSA/CMF-PBS solution. The cells were then stained using a Click-IT EdU-labelling reaction for 30 mins at room temperature (1.3 mM THPTA/CuSO<sub>4</sub> mix, 20  $\mu\text{M}$  AF488 Picolyl Azide and 2.5 mM Ascorbic Acid in a 1% BSA/CMF-PBS solution) prior to washing with PBT solution (CMF-PBS containing 1% BSA and 0.2% Tween-20) and mounting of the coverslips on glass slides using Prolong Diamond Mountant with DAPI (Life Technologies). For PCNA staining, cells were first hypotonically lysed in ice-cold ddH<sub>2</sub>O for 4 sec and then further permeabilized (to release non-DNA bound PCNA from the nucleus) in a lysis buffer containing 10 mM Tris (pH 7.4), 2.5 mM MgCl<sub>2</sub>, 0.5% NP-40, HALT protease and phosphatase inhibitor cocktail and 1 mM DTT for 10 min under constant agitation. The cells were then washed with 1x CMF-PBS (pH 7.4), blocked in PBT solution (also used for washes between staining steps) for 1 hr prior to Click-IT EdU AF488-labelling as described above. Cells were then stained with rabbit mAb D3H8P antibody (1:800) for 1.5 hr followed by Alexa546 goat anti-rabbit secondary antibody (1:500) for 45 mins prior to mounting. Fluorescent images (6 representative fields from duplicate wells/experiment) were acquired using either a Zeiss PlanAPOCHROMAT 10X (0.45 NA) or 20X objective (0.8 NA) and a Zeiss AxioCam Mrm CCD camera on a Zeiss Axio Imager.M2 microscopy system. EdU- and PCNA-positive

stained cells were quantified using ImageJ (NIH, Bethesda, MD) and threshold limits set based on the relevant comparative control (i.e., untreated or solvent control-treated cells) for each experiment.

***SSTN Stability and PK/PD studies.*** Stability assays for SSTN<sub>EGFR</sub> *in vitro* and *in vivo* (0.597 mg/kg) were conducted as previously described<sup>8</sup>.

***Tumor formation in animals.*** All animal studies were performed in accordance with UW and NIH guidelines after institutional review and approval. Under aseptic conditions, 2x10<sup>6</sup> UM-SCC47 cells were subcutaneously injected into the right and left flanks of 6-8-wk-old female, athymic *Foxn1<sup>nu</sup>* outbred nude mice (Envigo, East Millstone, NJ) in a 50:50 cell slurry in sterile PBS:Matrigel (BD Biosciences). Tumors were allowed to form for 1 week, then animals were randomized and surgically implanted with Alzet (Durect Corp., Cupertino, CA) osmotic pumps (Model 2004, 0.25 µl/h) containing either sterile saline or sterile saline plus 1.2 mM SSTN<sub>EGFR</sub>. After four weeks treatment, the mice were euthanized and tumors harvested and tumor volume ( $V = 0.524 \times \text{length} \times \text{width}^2$ ) determined<sup>104</sup>.

***Cell stress and apoptosis marker array.*** Screening for stress and/or apoptosis markers activated in cells treated with SSTN<sub>EGFR</sub> peptide for 16 hr (relative to vehicle-treated control cells) was conducted as previously described<sup>8</sup> using the PathScan Stress and Apoptosis Signaling Antibody Array Kit from Cell Signaling Technology.

**ACKNOWLEDGMENTS:** This work was supported by funds from the National Cancer Institute and National Institute of General Medical Sciences to A.C.R. (R01-CA163662,) P.F.L. (R35-CA210807, P01-CA022443), and R.A.A. (R01-GM57549, R01-CA104708), funds to A.C.R. and P.F.L. from the UW Head and Neck Cancer SPORE (P50DE026787), funds in support of head and neck cancer research to A.C.R., P.F. L. and R.A.A. from the UW School of Medicine and Public Health and the UW Carbone Cancer Center, and the use of the UW Carbone Cancer Center shared services, supported by P30 CA014520.

**Authorship Contributions:** D.M.B. participated in concept design, generation of data and writing the manuscript; K.S., N.S., S.E.N., D. L. and O.J. performed experiments and provided critique of the manuscript; R.A. A. and P.F.L. participated in concept design and critique of the manuscript, and A.C.R. oversaw concept design and participated in writing the manuscript.

**Conflict of Interest:** The authors declare no competing financial interest.

## REFERENCES CITED:

- 1 Agazie YM, Hayman MJ. Molecular mechanism for a role of SHP2 in epidermal growth factor receptor signaling. *Mol Cell Biol* 2003; 23: 7875-7886.
- 2 Al-Khalaf HH, Hendrayani SF, Aboussekhra A. The atr protein kinase controls UV-dependent upregulation of p16INK4A through inhibition of Skp2-related polyubiquitination/degradation. *Mol Cancer Res* 2011; 9: 311-319.
- 3 Amin DN, Hida K, Bielenberg DR, Klagsbrun M. Tumor endothelial cells express epidermal growth factor receptor (EGFR) but not ErbB3 and are responsive to EGF and to EGFR kinase inhibitors. *Cancer Res* 2006; 66: 2173-2180.
- 4 Arteaga CL. Epidermal growth factor receptor dependence in human tumors: more than just expression? *Oncologist* 2002; 7 Suppl 4: 31-39.
- 5 Beauvais DM, Burbach BJ, Rapraeger AC. The syndecan-1 ectodomain regulates alphavbeta3 integrin activity in human mammary carcinoma cells. *J Cell Biol* 2004; 167: 171-181.
- 6 Beauvais DM, Ell BJ, McWhorter AR, Rapraeger AC. Syndecan-1 regulates alphavbeta3 and alphavbeta5 integrin activation during angiogenesis and is blocked by synstatin, a novel peptide inhibitor. *J Exp Med* 2009; 206: 691-705.
- 7 Beauvais DM, Rapraeger AC. Syndecan-1 couples the insulin-like growth factor-1 receptor to inside-out integrin activation. *J Cell Sci* 2010; 123: 3796-3807.
- 8 Beauvais DM, Jung O, Yang Y, Sanderson RD, Rapraeger AC. Syndecan-1 (CD138) Suppresses Apoptosis in Multiple Myeloma by Activating IGF1 Receptor: Prevention by Synstatin IGF1R Inhibits Tumor Growth. *Cancer Res* 2016; 76: 4981-4993.
- 9 Bell SP, Dutta A. DNA replication in eukaryotic cells. *Annu Rev Biochem* 2002; 71: 333-374.
- 10 Bertotti A, Comoglio PM, Trusolino L. Beta4 integrin is a transforming molecule that unleashes Met tyrosine kinase tumorigenesis. *Cancer Res* 2005; 65: 10674-10679.

- 11 Bertotti A, Comoglio PM, Trusolino L. Beta4 integrin activates a Shp2-Src signaling pathway that sustains HGF-induced anchorage-independent growth. *J Cell Biol* 2006; 175: 993-1003.
- 12 Blow JJ, Gillespie PJ. Replication licensing and cancer--a fatal entanglement? *Nat Rev Cancer* 2008; 8: 799-806.
- 13 Bon G, Folgiero V, Di Carlo S, Sacchi A, Falcioni R. Involvement of alpha6beta4 integrin in the mechanisms that regulate breast cancer progression. *Breast Cancer Res* 2007; 9: 203.
- 14 Bonner WM, Redon CE, Dickey JS, Nakamura AJ, Sedelnikova OA, Solier S *et al.* GammaH2AX and cancer. *Nat Rev Cancer* 2008; 8: 957-967.
- 15 Bradford CR, Zhu S, Ogawa H, Ogawa T, Ubell M, Narayan A *et al.* P53 mutation correlates with cisplatin sensitivity in head and neck squamous cell carcinoma lines. *Head Neck* 2003; 25: 654-661.
- 16 Bruns CJ, Solorzano CC, Harbison MT, Ozawa S, Tsan R, Fan D *et al.* Blockade of the epidermal growth factor receptor signaling by a novel tyrosine kinase inhibitor leads to apoptosis of endothelial cells and therapy of human pancreatic carcinoma. *Cancer Res* 2000; 60: 2926-2935.
- 17 Burbach BJ, Ji Y, Rapraeger AC. Syndecan-1 ectodomain regulates matrix-dependent signaling in human breast carcinoma cells. *Exp Cell Res* 2004; 300: 234-247.
- 18 Carey TE, Wolf GT, Hsu S, Poore J, Peterson K, McClatchey KD. Expression of A9 antigen and loss of blood group antigens as determinants of survival in patients with head and neck squamous carcinoma. *Otolaryngol Head Neck Surg* 1987; 96: 221-230.
- 19 Carvalho FM, Bacchi LM, Santos PP, Bacchi CE. Triple-negative breast carcinomas are a heterogeneous entity that differs between young and old patients. *Clinics (Sao Paulo)* 2010; 65: 1033-1036.
- 20 Cassell A, Grandis JR. Investigational EGFR-targeted therapy in head and neck squamous cell carcinoma. *Expert Opin Investig Drugs* 2010; 19: 709-722.
- 21 Chang SS, Califano J. Current status of biomarkers in head and neck cancer. *J Surg Oncol* 2008; 97: 640-643.
- 22 Chaturvedi AK, Engels EA, Pfeiffer RM, Hernandez BY, Xiao W, Kim E *et al.* Human papillomavirus and rising oropharyngeal cancer incidence in the United States. *J Clin Oncol* 2011; 29: 4294-4301.
- 23 Choi P, Chen C. Genetic expression profiles and biologic pathway alterations in head and neck squamous cell carcinoma. *Cancer* 2005; 104: 1113-1128.
- 24 Choi Y, Kwon MJ, Lim Y, Yun JH, Lee W, Oh ES. Trans-regulation of Syndecan Functions by Hetero-oligomerization. *J Biol Chem* 2015; 290: 16943-16953.

- 25 Chung CH, Parker JS, Karaca G, Wu J, Funkhouser WK, Moore D *et al.* Molecular classification of head and neck squamous cell carcinomas using patterns of gene expression. *Cancer Cell* 2004; 5: 489-500.
- 26 Cimprich KA, Cortez D. ATR: an essential regulator of genome integrity. *Nat Rev Mol Cell Biol* 2008; 9: 616-627.
- 27 Dajee M, Lazarov M, Zhang JY, Cai T, Green CL, Russell AJ *et al.* NF-kappaB blockade and oncogenic Ras trigger invasive human epidermal neoplasia. *Nature* 2003; 421: 639-643.
- 28 Dancey JE, Freidlin B. Targeting epidermal growth factor receptor--are we missing the mark? *Lancet* 2003; 362: 62-64.
- 29 Dans M, Gagnoux-Palacios L, Blaikie P, Klein S, Mariotti A, Giancotti FG. Tyrosine phosphorylation of the beta 4 integrin cytoplasmic domain mediates Shc signaling to extracellular signal-regulated kinase and antagonizes formation of hemidesmosomes. *J Biol Chem* 2001; 276: 1494-1502.
- 30 Dent P, Reardon DB, Park JS, Bowers G, Logsdon C, Valerie K *et al.* Radiation-induced release of transforming growth factor alpha activates the epidermal growth factor receptor and mitogen-activated protein kinase pathway in carcinoma cells, leading to increased proliferation and protection from radiation-induced cell death. *Mol Biol Cell* 1999; 10: 2493-2506.
- 31 Dephoure N, Zhou C, Villen J, Beausoleil SA, Bakalarski CE, Elledge SJ *et al.* A quantitative atlas of mitotic phosphorylation. *Proc Natl Acad Sci U S A* 2008; 105: 10762-10767.
- 32 Diaz LK, Cristofanilli M, Zhou X, Welch KL, Smith TL, Yang Y *et al.* Beta4 integrin subunit gene expression correlates with tumor size and nuclear grade in early breast cancer. *Mod Pathol* 2005; 18: 1165-1175.
- 33 Dutta U, Shaw LM. A key tyrosine (Y1494) in the beta4 integrin regulates multiple signaling pathways important for tumor development and progression. *Cancer Res* 2008; 68: 8779-8787.
- 34 Falcioni R, Kennel SJ, Giacomini P, Zupi G, Sacchi A. Expression of tumor antigen correlated with metastatic potential of Lewis lung carcinoma and B16 melanoma clones in mice. *Cancer Res* 1986; 46: 5772-5778.
- 35 Falcioni R, Antonini A, Nistico P, Di Stefano S, Crescenzi M, Natali PG *et al.* Alpha 6 beta 4 and alpha 6 beta 1 integrins associate with ErbB-2 in human carcinoma cell lines. *Exp Cell Res* 1997; 236: 76-85.
- 36 Flynn RL, Zou L. ATR: a master conductor of cellular responses to DNA replication stress. *Trends Biochem Sci* 2011; 36: 133-140.
- 37 Folgiero V, Avetrani P, Bon G, Di Carlo SE, Fabi A, Nistico C *et al.* Induction of ErbB-3 expression by alpha6beta4 integrin contributes to tamoxifen resistance in ERbeta1-negative breast carcinomas. *PLoS One* 2008; 3: e1592.

- 38 Friedrichs K, Ruiz P, Franke F, Gille I, Terpe HJ, Imhof BA. High expression level of alpha 6 integrin in human breast carcinoma is correlated with reduced survival. *Cancer Res* 1995; 55: 901-906.
- 39 Gambaletta D, Marchetti A, Benedetti L, Mercurio AM, Sacchi A, Falcioni R. Cooperative signaling between alpha(6)beta(4) integrin and ErbB-2 receptor is required to promote phosphatidylinositol 3-kinase-dependent invasion. *J Biol Chem* 2000; 275: 10604-10610.
- 40 Giancotti FG. Targeting integrin beta4 for cancer and anti-angiogenic therapy. *Trends Pharmacol Sci* 2007; 28: 506-511.
- 41 Ginos MA, Page GP, Michalowicz BS, Patel KJ, Volker SE, Pambuccian SE *et al.* Identification of a gene expression signature associated with recurrent disease in squamous cell carcinoma of the head and neck. *Cancer Res* 2004; 64: 55-63.
- 42 Greuber EK, Smith-Pearson P, Wang J, Pendergast AM. Role of ABL family kinases in cancer: from leukaemia to solid tumours. *Nat Rev Cancer* 2013; 13: 559-571.
- 43 Gryp JL, Gutierrez GJ. UnCHKed DNA replication: A stressful matter. *Cell Cycle* 2012; 11: 3917-3918.
- 44 Guo W, Pylayeva Y, Pepe A, Yoshioka T, Muller WJ, Inghirami G *et al.* Beta 4 integrin amplifies ErbB2 signaling to promote mammary tumorigenesis. *Cell* 2006; 126: 489-502.
- 45 Haigis KM, Sweet-Cordero A. New insights into oncogenic stress. *Nat Genet* 2011; 43: 177-178.
- 46 Hanahan D, Weinberg RA. Hallmarks of cancer: the next generation. *Cell* 2011; 144: 646-674.
- 47 Hantschel O, Superti-Furga G. Regulation of the c-Abl and Bcr-Abl tyrosine kinases. *Nat Rev Mol Cell Biol* 2004; 5: 33-44.
- 48 Harari PM, Wheeler DL, Grandis JR. Molecular target approaches in head and neck cancer: epidermal growth factor receptor and beyond. *Semin Radiat Oncol* 2009; 19: 63-68.
- 49 Haupt B, Ro JY, Schwartz MR. Basal-like breast carcinoma: a phenotypically distinct entity. *Arch Pathol Lab Med* 2010; 134: 130-133.
- 50 Hawley-Nelson P, Vousden KH, Hubbert NL, Lowy DR, Schiller JT. HPV16 E6 and E7 proteins cooperate to immortalize human foreskin keratinocytes. *EMBO J* 1989; 8: 3905-3910.
- 51 Herschkowitz JI, Simin K, Weigman VJ, Mikaelian I, Usary J, Hu Z *et al.* Identification of conserved gene expression features between murine mammary carcinoma models and human breast tumors. *Genome Biol* 2007; 8: R76.
- 52 Hopkinson SB, Jones JC. The N terminus of the transmembrane protein BP180 interacts with the N-terminal domain of BP230, thereby mediating keratin cytoskeleton anchorage to the cell surface at the site of the hemidesmosome. *Mol Biol Cell* 2000; 11: 277-286.



- 53 Hynes NE, Lane HA. ERBB receptors and cancer: the complexity of targeted inhibitors. *Nat Rev Cancer* 2005; 5: 341-354.
- 54 Hynes NE, MacDonald G. ErbB receptors and signaling pathways in cancer. *Curr Opin Cell Biol* 2009; 21: 177-184.
- 55 Jabbar S, Strati K, Shin MK, Pitot HC, Lambert PF. Human papillomavirus type 16 E6 and E7 oncoproteins act synergistically to cause head and neck cancer in mice. *Virology* 2010; 407: 60-67.
- 56 Jung O, Trapp-Stamborski V, Purushothaman A, Jin H, Wang H, Sanderson RD *et al.* Heparanase-induced shedding of syndecan-1/CD138 in myeloma and endothelial cells activates VEGFR2 and an invasive phenotype: prevention by novel synstatins. *Oncogenesis* 2016; 5: e202.
- 57 Kastan MB, Bartek J. Cell-cycle checkpoints and cancer. *Nature* 2004; 432: 316-323.
- 58 Kaur P, McDougall JK. HPV-18 immortalization of human keratinocytes. *Virology* 1989; 173: 302-310.
- 59 Kedar D, Baker CH, Killion JJ, Dinney CP, Fidler IJ. Blockade of the epidermal growth factor receptor signaling inhibits angiogenesis leading to regression of human renal cell carcinoma growing orthotopically in nude mice. *Clin Cancer Res* 2002; 8: 3592-3600.
- 60 Keller J, Nimnual AS, Shroyer KR, Joy C, Ischenko I, Chandler CS *et al.* Ron tyrosine kinase receptor synergises with EGFR to confer adverse features in head and neck squamous cell carcinoma. *Br J Cancer* 2013; 109: 482-492.
- 61 Kimmel KA, Carey TE. Altered expression in squamous carcinoma cells of an orientation restricted epithelial antigen detected by monoclonal antibody A9. *Cancer Res* 1986; 46: 3614-3623.
- 62 Koundrioukoff S, Jonsson ZO, Hasan S, de Jong RN, van der Vliet PC, Hottiger MO *et al.* A direct interaction between proliferating cell nuclear antigen (PCNA) and Cdk2 targets PCNA-interacting proteins for phosphorylation. *J Biol Chem* 2000; 275: 22882-22887.
- 63 Lewis JM, Baskaran R, Taagepera S, Schwartz MA, Wang JY. Integrin regulation of c-Abl tyrosine kinase activity and cytoplasmic-nuclear transport. *Proc Natl Acad Sci U S A* 1996; 93: 15174-15179.
- 64 Lewis JM, Schwartz MA. Integrins regulate the association and phosphorylation of paxillin by c-Abl. *J Biol Chem* 1998; 273: 14225-14230.
- 65 Litjens SH, de Pereda JM, Sonnenberg A. Current insights into the formation and breakdown of hemidesmosomes. *Trends Cell Biol* 2006; 16: 376-383.
- 66 Livasy CA, Karaca G, Nanda R, Tretiakova MS, Olopade OI, Moore DT *et al.* Phenotypic evaluation of the basal-like subtype of invasive breast carcinoma. *Mod Pathol* 2006; 19: 264-271.



- 67 Llopis A, Salvador N, Ercilla A, Guaita-Esteruelas S, Barrantes Idel B, Gupta J *et al*. The stress-activated protein kinases p38alpha/beta and JNK1/2 cooperate with Chk1 to inhibit mitotic entry upon DNA replication arrest. *Cell Cycle* 2012; 11: 3627-3637.
- 68 Lu S, Simin K, Khan A, Mercurio AM. Analysis of integrin beta4 expression in human breast cancer: association with basal-like tumors and prognostic significance. *Clin Cancer Res* 2008; 14: 1050-1058.
- 69 Mailand N, Gibbs-Seymour I, Bekker-Jensen S. Regulation of PCNA-protein interactions for genome stability. *Nat Rev Mol Cell Biol* 2013; 14: 269-282.
- 70 Mainiero F, Pepe A, Yeon M, Ren Y, Giancotti FG. The intracellular functions of alpha6beta4 integrin are regulated by EGF. *J Cell Biol* 1996; 134: 241-253.
- 71 Manie SN, Lebeau J, Chevet E. Cellular mechanisms of endoplasmic reticulum stress signaling in health and disease. 3. Orchestrating the unfolded protein response in oncogenesis: an update. *Am J Physiol Cell Physiol* 2014; 307: C901-907.
- 72 Margadant C, Frijns E, Wilhelmsen K, Sonnenberg A. Regulation of hemidesmosome disassembly by growth factor receptors. *Curr Opin Cell Biol* 2008; 20: 589-596.
- 73 Mariotti A, Kedeshian PA, Dans M, Curatola AM, Gagnoux-Palacios L, Giancotti FG. EGF-R signaling through Fyn kinase disrupts the function of integrin alpha6beta4 at hemidesmosomes: role in epithelial cell migration and carcinoma invasion. *J Cell Biol* 2001; 155: 447-458.
- 74 McFall AJ, Rapraeger AC. Identification of an adhesion site within the syndecan-4 extracellular protein domain. *J Biol Chem* 1997; 272: 12901-12904.
- 75 McFall AJ, Rapraeger AC. Characterization of the high affinity cell-binding domain in the cell surface proteoglycan syndecan-4. *J Biol Chem* 1998; 273: 28270-28276.
- 76 McQuade KJ, Rapraeger AC. Syndecan-1 transmembrane and extracellular domains have unique and distinct roles in cell spreading. *J Biol Chem* 2003; 278: 46607-46615.
- 77 Miotto B, Struhl K. JNK1 phosphorylation of Cdt1 inhibits recruitment of HBO1 histone acetylase and blocks replication licensing in response to stress. *Mol Cell* 2011; 44: 62-71.
- 78 Moldovan GL, Pfander B, Jentsch S. PCNA, the maestro of the replication fork. *Cell* 2007; 129: 665-679.
- 79 Nievers MG, Schaapveld RQ, Sonnenberg A. Biology and function of hemidesmosomes. *Matrix Biol* 1999; 18: 5-17.
- 80 Nikolopoulos SN, Blaikie P, Yoshioka T, Guo W, Giancotti FG. Integrin beta4 signaling promotes tumor angiogenesis. *Cancer Cell* 2004; 6: 471-483.
- 81 Oh ES, Couchman JR. Syndecans-2 and -4; close cousins, but not identical twins. *Mol Cells* 2004; 17: 181-187.

- 82 Olivier M, Eeles R, Hollstein M, Khan MA, Harris CC, Hainaut P. The IARC TP53 database: new online mutation analysis and recommendations to users. *Hum Mutat* 2002; 19: 607-614.
- 83 Pardee AB. G1 events and regulation of cell proliferation. *Science* 1989; 246: 603-608.
- 84 Patarroyo M, Tryggvason K, Virtanen I. Laminin isoforms in tumor invasion, angiogenesis and metastasis. *Semin Cancer Biol* 2002; 12: 197-207.
- 85 Peace BE, Hill KJ, Degen SJ, Waltz SE. Cross-talk between the receptor tyrosine kinases Ron and epidermal growth factor receptor. *Exp Cell Res* 2003; 289: 317-325.
- 86 Pellegata NS, Antoniono RJ, Redpath JL, Stanbridge EJ. DNA damage and p53-mediated cell cycle arrest: a reevaluation. *Proc Natl Acad Sci U S A* 1996; 93: 15209-15214.
- 87 Perez-Ordenez B, Beauchemin M, Jordan RC. Molecular biology of squamous cell carcinoma of the head and neck. *J Clin Pathol* 2006; 59: 445-453.
- 88 Perou CM, Sorlie T, Eisen MB, van de Rijn M, Jeffrey SS, Rees CA *et al.* Molecular portraits of human breast tumours. *Nature* 2000; 406: 747-752.
- 89 Rapraeger AC. Synstatin: a selective inhibitor of the syndecan-1-coupled IGF1R- $\alpha$ 5 $\beta$ 3 integrin complex in tumorigenesis and angiogenesis. *FEBS J* 2013; 280: 2207-2215.
- 90 Rapraeger AC, Ell BJ, Roy M, Li X, Morrison OR, Thomas GM *et al.* Vascular endothelial-cadherin stimulates syndecan-1-coupled insulin-like growth factor-1 receptor and cross-talk between  $\alpha$ 5 $\beta$ 3 integrin and vascular endothelial growth factor receptor 2 at the onset of endothelial cell dissemination during angiogenesis. *FEBS J* 2013; 280: 2194-2206.
- 91 Reinhardt HC, Aslanian AS, Lees JA, Yaffe MB. p53-deficient cells rely on ATM- and ATR-mediated checkpoint signaling through the p38MAPK/MK2 pathway for survival after DNA damage. *Cancer Cell* 2007; 11: 175-189.
- 92 Ronsin C, Muscatelli F, Mattei MG, Breathnach R. A novel putative receptor protein tyrosine kinase of the met family. *Oncogene* 1993; 8: 1195-1202.
- 93 Rubin Grandis J, Chakraborty A, Melhem MF, Zeng Q, Tweardy DJ. Inhibition of epidermal growth factor receptor gene expression and function decreases proliferation of head and neck squamous carcinoma but not normal mucosal epithelial cells. *Oncogene* 1997; 15: 409-416.
- 94 Santoro MM, Gaudino G, Marchisio PC. The MSP receptor regulates  $\alpha$ 6 $\beta$ 4 and  $\alpha$ 3 $\beta$ 1 integrins via 14-3-3 proteins in keratinocyte migration. *Dev Cell* 2003; 5: 257-271.
- 95 Scaltriti M, Baselga J. The epidermal growth factor receptor pathway: a model for targeted therapy. *Clin Cancer Res* 2006; 12: 5268-5272.

- 96 Schmidt-Ullrich RK, Valerie KC, Chan W, McWilliams D. Altered expression of epidermal growth factor receptor and estrogen receptor in MCF-7 cells after single and repeated radiation exposures. *Int J Radiat Oncol Biol Phys* 1994; 29: 813-819.
- 97 Schramek D, Kotsinas A, Meixner A, Wada T, Elling U, Pospisilik JA *et al.* The stress kinase MKK7 couples oncogenic stress to p53 stability and tumor suppression. *Nat Genet* 2011; 43: 212-219.
- 98 Shaw LM, Rabinovitz I, Wang HH, Toker A, Mercurio AM. Activation of phosphoinositide 3-OH kinase by the alpha6beta4 integrin promotes carcinoma invasion. *Cell* 1997; 91: 949-960.
- 99 Shaw LM. Identification of insulin receptor substrate 1 (IRS-1) and IRS-2 as signaling intermediates in the alpha6beta4 integrin-dependent activation of phosphoinositide 3-OH kinase and promotion of invasion. *Mol Cell Biol* 2001; 21: 5082-5093.
- 100 Sorensen CS, Syljuasen RG, Falck J, Schroeder T, Ronnstrand L, Khanna KK *et al.* Chk1 regulates the S phase checkpoint by coupling the physiological turnover and ionizing radiation-induced accelerated proteolysis of Cdc25A. *Cancer Cell* 2003; 3: 247-258.
- 101 Stein AP, Saha S, Kraninger JL, Swick AD, Yu M, Lambert PF *et al.* Prevalence of Human Papillomavirus in Oropharyngeal Cancer: A Systematic Review. *Cancer J* 2015; 21: 138-146.
- 102 Strati K, Pitot HC, Lambert PF. Identification of biomarkers that distinguish human papillomavirus (HPV)-positive versus HPV-negative head and neck cancers in a mouse model. *Proc Natl Acad Sci U S A* 2006; 103: 14152-14157.
- 103 Strati K, Lambert PF. Role of Rb-dependent and Rb-independent functions of papillomavirus E7 oncogene in head and neck cancer. *Cancer Res* 2007; 67: 11585-11593.
- 104 Tomayko MM, Reynolds CP. Determination of subcutaneous tumor size in athymic (nude) mice. *Cancer Chemother Pharmacol* 1989; 24: 148-154.
- 105 Tran M, Rousselle P, Nokelainen P, Tallapragada S, Nguyen NT, Fincher EF *et al.* Targeting a tumor-specific laminin domain critical for human carcinogenesis. *Cancer Res* 2008; 68: 2885-2894.
- 106 Trusolino L, Bertotti A, Comoglio PM. A signaling adapter function for alpha6beta4 integrin in the control of HGF-dependent invasive growth. *Cell* 2001; 107: 643-654.
- 107 Tsuruta D, Kobayashi H, Imanishi H, Sugawara K, Ishii M, Jones JC. Laminin-332-integrin interaction: a target for cancer therapy? *Curr Med Chem* 2008; 15: 1968-1975.
- 108 Van Waes C, Kozarsky KF, Warren AB, Kidd L, Paugh D, Liebert M *et al.* The A9 antigen associated with aggressive human squamous carcinoma is structurally and functionally similar to the newly defined integrin alpha 6 beta 4. *Cancer Res* 1991; 51: 2395-2402.
- 109 Vlieghe P, Lisowski V, Martinez J, Khrestchatisky M. Synthetic therapeutic peptides: science and market. *Drug Discov Today* 2010; 15: 40-56.

- 110 Wang H, Leavitt L, Ramaswamy R, Rapraeger AC. Interaction of syndecan and alpha6beta4 integrin cytoplasmic domains: Regulation of ErbB2-mediated integrin activation. *J Biol Chem* 2010; 285: 13569-13579.
- 111 Wang H, Jin H, Beauvais DM, Rapraeger AC. Cytoplasmic domain interactions of syndecan-1 and syndecan-4 with alpha6beta4 integrin mediate human epidermal growth factor receptor (HER1 and HER2)-dependent motility and survival. *J Biol Chem* 2014; 289: 30318-30332.
- 112 Wang H, Jin H, Rapraeger AC. Syndecan-1 and syndecan-4 capture epidermal growth factor receptor family members and the alpha3beta1 integrin via binding sites in their ectodomains: novel synstatins prevent kinase capture and inhibit alpha6beta4-integrin-dependent epithelial cell motility. *J Biol Chem* 2015; 290: 26103-26113.
- 113 Whiteford JR, Couchman JR. A conserved NXIP motif is required for cell adhesion properties of the syndecan-4 ectodomain. *J Biol Chem* 2006; 281: 32156-32163.
- 114 Whiteford JR, Behrends V, Kirby H, Kusche-Gullberg M, Muramatsu T, Couchman JR. Syndecans promote integrin-mediated adhesion of mesenchymal cells in two distinct pathways. *Exp Cell Res* 2007; 313: 3902-3913.
- 115 Wilhelmsen K, Litjens SH, Sonnenberg A. Multiple functions of the integrin alpha6beta4 in epidermal homeostasis and tumorigenesis. *Mol Cell Biol* 2006; 26: 2877-2886.
- 116 Wilhelmsen K, Litjens SH, Kuikman I, Margadant C, van Rheenen J, Sonnenberg A. Serine phosphorylation of the integrin beta4 subunit is necessary for epidermal growth factor receptor induced hemidesmosome disruption. *Mol Biol Cell* 2007; 18: 3512-3522.
- 117 Wolf GT, Carey TE, Schmaltz SP, McClatchey KD, Poore J, Glaser L *et al.* Altered antigen expression predicts outcome in squamous cell carcinoma of the head and neck. *J Natl Cancer Inst* 1990; 82: 1566-1572.
- 118 Woodworth CD, Bowden PE, Doniger J, Pirisi L, Barnes W, Lancaster WD *et al.* Characterization of normal human exocervical epithelial cells immortalized in vitro by papillomavirus types 16 and 18 DNA. *Cancer Res* 1988; 48: 4620-4628.
- 119 Xiao Z, Chen Z, Gunasekera AH, Sowin TJ, Rosenberg SH, Fesik S *et al.* Chk1 mediates S and G2 arrests through Cdc25A degradation in response to DNA-damaging agents. *J Biol Chem* 2003; 278: 21767-21773.
- 120 Yang X, Dutta U, Shaw LM. SHP2 mediates the localized activation of Fyn downstream of the alpha6beta4 integrin to promote carcinoma invasion. *Mol Cell Biol* 2010; 30: 5306-5317.
- 121 Yao HP, Zhou YQ, Zhang R, Wang MH. MSP-RON signalling in cancer: pathogenesis and therapeutic potential. *Nat Rev Cancer* 2013; 13: 466-481.
- 122 Yoshioka T, Otero J, Chen Y, Kim YM, Koutcher JA, Satagopan J *et al.* beta4 Integrin signaling induces expansion of prostate tumor progenitors. *J Clin Invest* 2013; 123: 682-699.

- 123 Yu PT, Babicky M, Jaquish D, French R, Marayuma K, Mose E *et al.* The RON-receptor regulates pancreatic cancer cell migration through phosphorylation-dependent breakdown of the hemidesmosome. *Int J Cancer* 2012; 131: 1744-1754.
- 124 Zhao H, Ho PC, Lo YH, Espejo A, Bedford MT, Hung MC *et al.* Interaction of proliferation cell nuclear antigen (PCNA) with c-Abl in cell proliferation and response to DNA damages in breast cancer. *PLoS One* 2012; 7: e29416.
- 125 Zhao H, Chen MS, Lo YH, Waltz SE, Wang J, Ho PC *et al.* The Ron receptor tyrosine kinase activates c-Abl to promote cell proliferation through tyrosine phosphorylation of PCNA in breast cancer. *Oncogene* 2014; 33: 1429-1437.
- 126 Zimmermann M, Zouhair A, Azria D, Ozsahin M. The epidermal growth factor receptor (EGFR) in head and neck cancer: its role and treatment implications. *Radiat Oncol* 2006; 1: 11.

## FIGURE LEGENDS

**Figure 1. Quantification of impaired growth of SSTN<sub>EGFR</sub>-treated neoplastic and preneoplastic epithelial cells.** **A-D**, Cells undergoing logarithmic growth are treated with 0, 3, 10 or 30  $\mu$ M SSTN<sub>EGFR</sub> for 4 days, followed by quantification of cell number, expressed as a percentage of untreated (control) cells: **A**. Non-tumorigenic epidermal (HaCaT), oral (NOK, HTE) and breast (MCF10A) epithelial cells; **B**. HPV-negative (UM-SCC1, TU-138, SCC25, UM-SCC6,) and HPV-positive (UD-SCC2, UM-SCC47, UPCI-SCC90) HNC cell lines; **C**. triple-negative (MDA-MB-468, MDA-MB-231) and HER2+ (SKBr3) breast carcinoma; **D**. NOK or HTE cells infected with HPV18 or transfected with HPV16 E6, E7 or E6 and E7 oncogenes (preneoplastic cells); **E, F**. Select HNC and breast carcinoma cell lines are treated with either EGFR-specific inhibitory antibody cetuximab (0, 10 or 100 nM) or kinase inhibitor erlotinib (0, 0.2, or 1.0  $\mu$ M).

**Figure 2. Relative expression of members of the Sdc4:EGFR:ITG complex on non-tumorigenic, preneoplastic and neoplastic epithelial cells.** **A-C**, Cell surface of expression of Sdc4 (mAb 8G3, red),  $\alpha$ 3 $\beta$ 1 (mAb P1B5, blue) and  $\alpha$ 6 $\beta$ 4 (mAb3E1, green) integrins, and EGFR (mAb EGFR.1, black) are analyzed by flow cytometry compared to nonspecific IgG (gray profile): **A**. Select HNC (UM-

SCC47, UM-SCC1) and breast carcinoma (MDA-MB-231, SKBr3) cell lines; **B.** Non-transformed human tonsillar epithelial cells (HTE) compared to preneoplastic HTE-E6, HTE-E7 cells and HTE-E6/E7 cells; **C.** Non-transformed oral keratinocytes (NOK) compared to preneoplastic NOK-E7 and NOK-E6/E7 cells. **D.** Western blot analysis of Sdc4 expression in NOKs, NOKs-E6/E7, HTEs or HTEs-E6/E7 whole cell lysates (50  $\mu$ g total protein/lane) following treatment of the cells with or without trypsin to remove cell surface Sdc4 prior to cell lysis.

**Figure 3. SSTN treatment of UM-SCC47 HNC tumor xenografts.** **A.** SSTN<sub>EGFR</sub>, or the GRDGSP integrin inhibitory peptide used as a control, were incubated in either PBS or human plasma for up to 72h at 37°C, then tested for activity. **B.** SSTN half-life following single intravenous (i.v.) injection of 0.597 mg/kg SSTN<sub>EGFR</sub>. **C.** Steady-state SSTN in mouse plasma following daily subcutaneous injection of 0.597 mg/kg peptide. Each data point is the mean  $\pm$  SEM of three mice, collected 24 hr after injection. **D.** Subcutaneous UM-SCC47 xenografts in nude mice were treated using Alzet osmotic pump delivery of 1.8 mg/kg/day SSTN<sub>EGFR</sub> ( $\sim$ 10  $\mu$ M plasma level). Each data point is the mean of six tumors.

**Figure 4. SSTN<sub>EGFR</sub> causes S-phase arrest of neoplastic and preneoplastic epithelial cells.** **A.** HaCaT keratinocytes or UM-SCC47 cells were treated with or without 30  $\mu$ M SSTN<sub>EGFR</sub> for up to 16 hr. EdU was added for the last 45 min, followed by PFA fixation, saponin permeabilization, staining with Alexa488 azide (Click-IT labelling reaction) and propidium iodide (PI), and flow cytometry analysis to monitor EdU incorporation and DNA content, respectively; **B.** UM-SCC47 cells are arrest in early S-phase using a double thymidine block, released for either 3 or 8 hr, then subjection to 8 hr treatment with either 30  $\mu$ M SSTN<sub>EGFR</sub> or vehicle alone. EdU was added for the last 45 min and the cells were analyzed by flow for DNA content and EdU incorporation. **C.** UM-

SCC47 or MDA-MB-231 cells were treated with either vehicle alone for 6 hr, 30  $\mu$ M SSTN<sub>EGFR</sub> for either 1 or 6 hr, 8 Gy ionizing radiation (IR), or 5 mM hydroxyurea (HU) for 1 hr prior to lysing and analysis for activation of DNA damage response effectors using mAbs to pS345-Chk1, pT68-Chk1 or pS139-H2AX. **D.** UM-SCC47 and MDA-MB-231 cells were treated with vehicle alone for 6hr, 30  $\mu$ M SSTN<sub>EGFR</sub> for 1 or 6 hr, or 5 nM Actinomycin D (Act D) for 24 hr to induce stress, then lysed and analyzed for total p53 protein. Non-transformed NOK or MCF10A cells were treated with or without Act D as positive controls for the stress response. Tubulin (**C and D**) and actin (**C**) serve as loading controls.

**Figure 5. Diminished DNA synthesis is mirrored by loss of PCNA.** **A.** Select neoplastic, preneoplastic and non-transformed epithelial cells were cultured with or without 30  $\mu$ M SSTN<sub>EGFR</sub> for up to 6 hr, followed by EdU labeling for 45 min in the continued presence of the peptide. EdU incorporation is expressed as a percentage of that observed in cells grown in the presence of vehicle alone; **B.** UM-SCC47 cells were treated with 30  $\mu$ M SSTN<sub>EGFR</sub> or vehicle for 3 hr, with EdU added for the last 45 min, then extracted and stained to detect EdU incorporation and together with either DNA-bound PCNA or the origin licensing factor MCM2; **C.** Quantification of PCNA staining in HN or mammary cells treated either with vehicle or 30  $\mu$ M SSTN<sub>EGFR</sub> for 3 hr.

**Figure 6. Role of the individual receptors in cell invasion or S-phase progression.** **A.** UM-SCC47 cells were treated for 72 hr with either control siRNA, or siRNA specific for human Sdc4,  $\beta$ 4 integrin (ITGB4), EGFR, or  $\alpha$ 3 integrin (ITGA3), followed by addition of EdU for 45 min to monitor DNA synthesis prior to fixation and staining; Western blots showing individual receptor expression 72 hr after siRNA transfection are shown (inset); **B.** Either NOKs or UM-SCC47 cells were allowed to invade through LN332-coated filters for 16 hr in serum-free conditions following stimulation with 10 ng/ml EGF +/- 30  $\mu$ M SSTN<sub>EGFR</sub> or vehicle; **C.** Quantification of NOK or UM-



SCC47 cell invasion as in **(B)** in the presence or absence of the EGFR kinase inhibitors gefitinib (3  $\mu$ M) or erlotinib (2  $\mu$ M), SFK inhibitor PP2 or its inactive analogue PP3 (3  $\mu$ M), MST1R/RON inhibitors CAS 913376-84-8 (1  $\mu$ M) or BMS-0777607 (3  $\mu$ M), c-Abl inhibitor GNF5 (2  $\mu$ M), pan-p38MAPK inhibitor BIRB-796 (100 nM) and  $\alpha$ 6 $\beta$ 4 (3E1) or  $\alpha$ 3 $\beta$ 1 (P1B5) integrin blocking antibody (10  $\mu$ g/ml); **D.** DNA synthesis is detected by EdU incorporation in UM-SCC47 cells grown for 3 hr in medium containing SSTN<sub>EGFR</sub>, the EGFR kinase inhibitors gefitinib or erlotinib, or SFK inhibitor PP2 versus its inactive analogue PP3.

**Figure 7. Active MST1R/RON and Abl kinases are required to sustain S-phase progression in carcinoma cells.** **A, B.** Select neoplastic, preneoplastic and non-transformed epithelial cells were treated for 3 hr in DMSO (vehicle), the MST1R/RON inhibitors CAS 913376-84-8 (1  $\mu$ M) or BMS-777607 (3  $\mu$ M) or the Abl kinase inhibitors GNF5 (2  $\mu$ M) or PPY-A (0.2  $\mu$ M). EdU was added for the last 45 min. The cells were fixed and extracted to stain for EdU incorporation (**A**) or DNA-bound PCNA (**B**); **C.** UM-SCC47 cells treated with vehicle alone or 30  $\mu$ M SSTN<sub>EGFR</sub> for 3 hr were lysed and subjected to immunoprecipitation with non-specific isotype control IgG or mAb 8G3 to Sdc4. Immunoprecipitates were probed for the presence of EGFR,  $\alpha$ 3 integrin (ITGA3),  $\beta$ 4 integrin (ITGB4), total and active MST1R/RON (pY1238/1239), total and active c-Abl (pY412 and pY245), Sdc2 and Sdc4; **D.** UM-SCC47 cells were treated for 3 hr with vehicle or 30  $\mu$ M SSTN<sub>EGFR</sub>, then extracted and analyzed on western blots for active pY245 or pY412 phosphorylated c-Abl.

**Figure 8. SSTN-induced cell cycle arrest depends on activated p38MAPK.** **A.** Quantification of p38MAPK activation by antibody array (pT180/pY182) in non-transformed (HTE, NOK, HaCaT) keratinocytes and HNC cells (UM-SCC-47, UM-SCC25). **B-D,** Detection of pT180/pY182 p38MAPK following treatment with vehicle alone or 30  $\mu$ M SSTN<sub>EGFR</sub> in NOKs



or NOKs expressing the HPV16 E6/E7 oncogenes (**B**), in HNC cells (**C**), or **in** non-transformed (MCF10A) or transformed (MDA-MB-231, MDA-MB-468, SKBr3) mammary epithelial cells (**D**); **E**. UM-SCC47 cells treated with 30  $\mu$ M SSTN<sub>EGFR</sub> in the presence or absence of p38MAPK inhibitors 0.1  $\mu$ M BIRB-796 or 0.3  $\mu$ M Losmapimod for 1 h followed by continued treatment for 45 min in the presence of EdU; **F**. Western blot analysis of p38MAPK inhibition by 0.1  $\mu$ M BIRB-796 or 0.3  $\mu$ M Losmapimod in UM-SCC47 cells (30  $\mu$ g total protein/lane); **G**. Quantification of DNA-bound PCNA in select cells treated with 30  $\mu$ M SSTN<sub>EGFR</sub> with or without p38MAPK inhibitors for 3 hr; **H**. Model showing role of the Sdc:RTK:ITG complex in promoting EGFR kinase-dependent cell invasion and its EGFR kinase-independent suppression of stress-induced p38MAPK activation, thereby allowing normal PCNA loading/unloading in tumor cells.

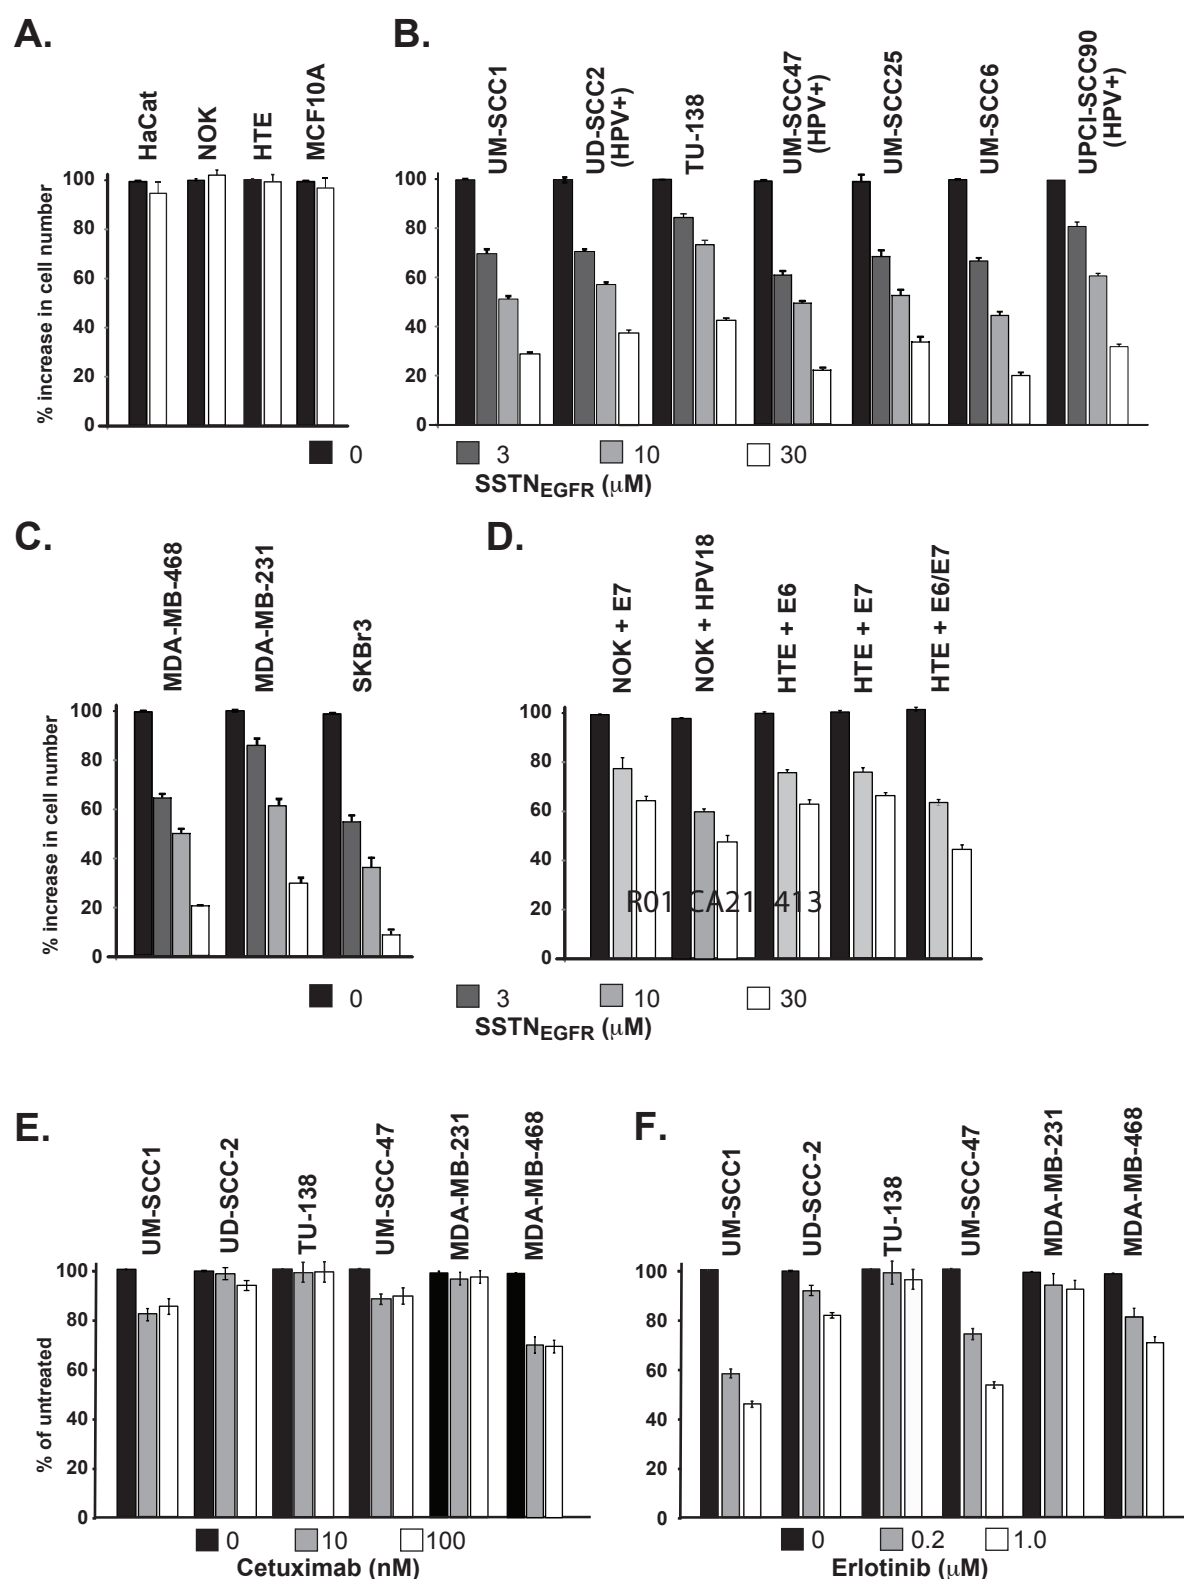

FIGURE 1. BEAUVAIS ET AL.

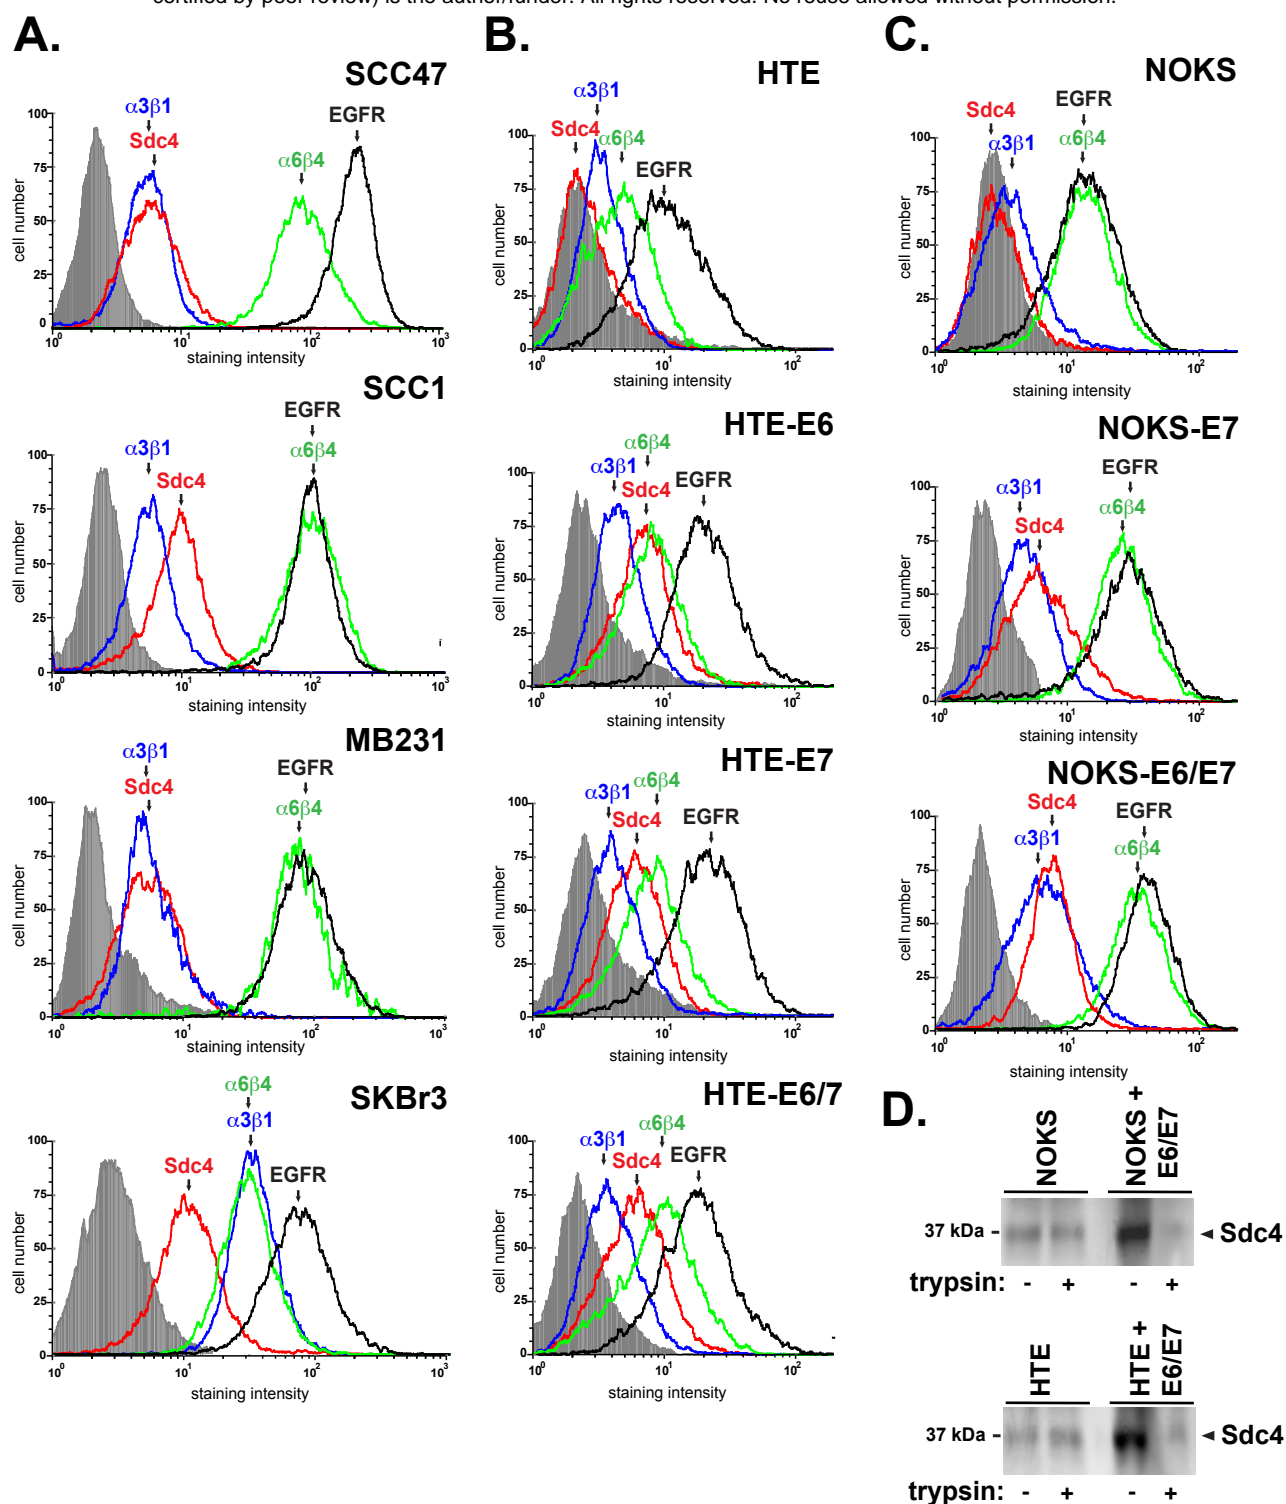

FIGURE 2. BEAUVAIS ET AL.

## A. SSTN stability in plasma      B. SSTN clearance in vivo

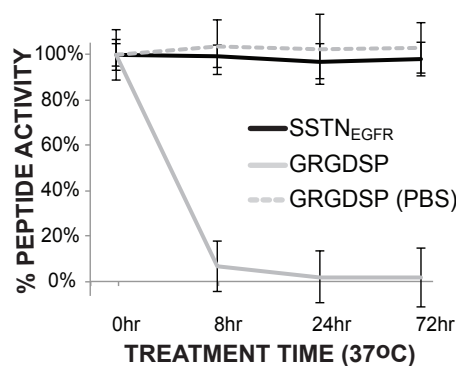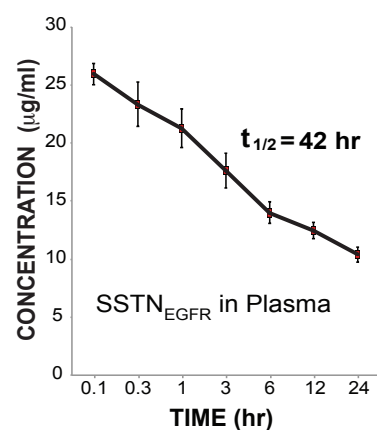

## C. SSTN accumulation in vivo

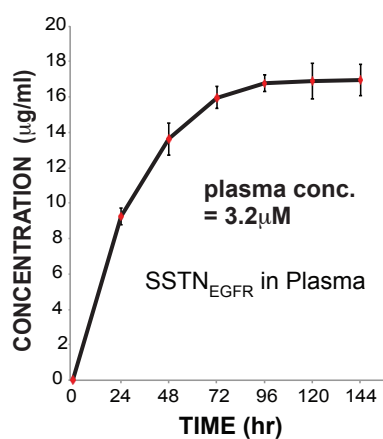

## D. UM-SCC47 xenografts.

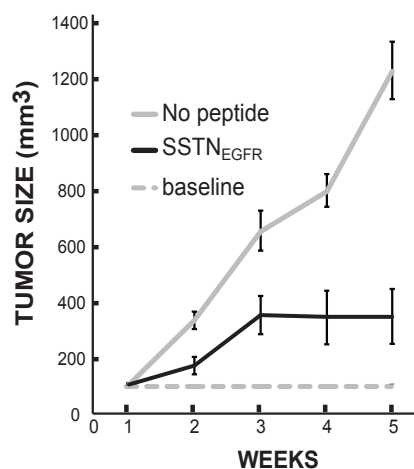

FIGURE 3. BEAUVAIS ET AL.

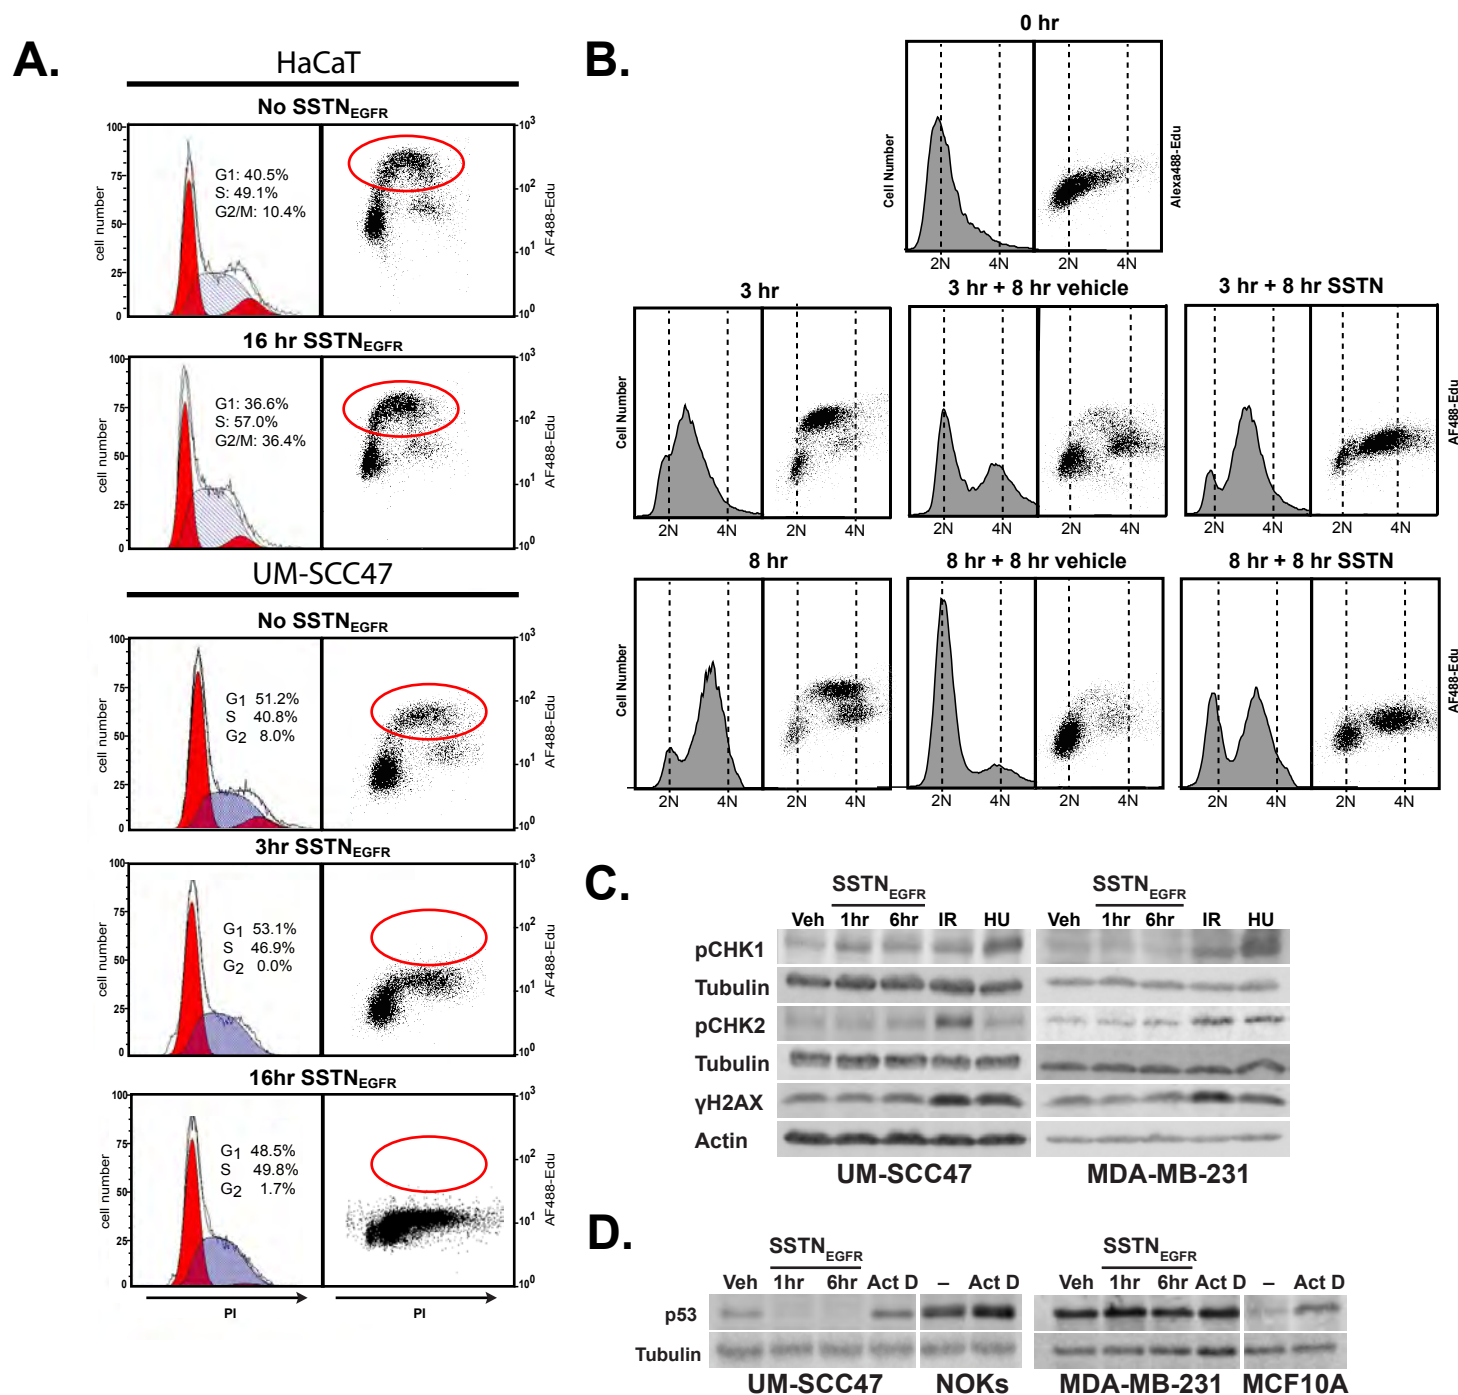

FIGURE 4. BEAUVAIS ET AL.

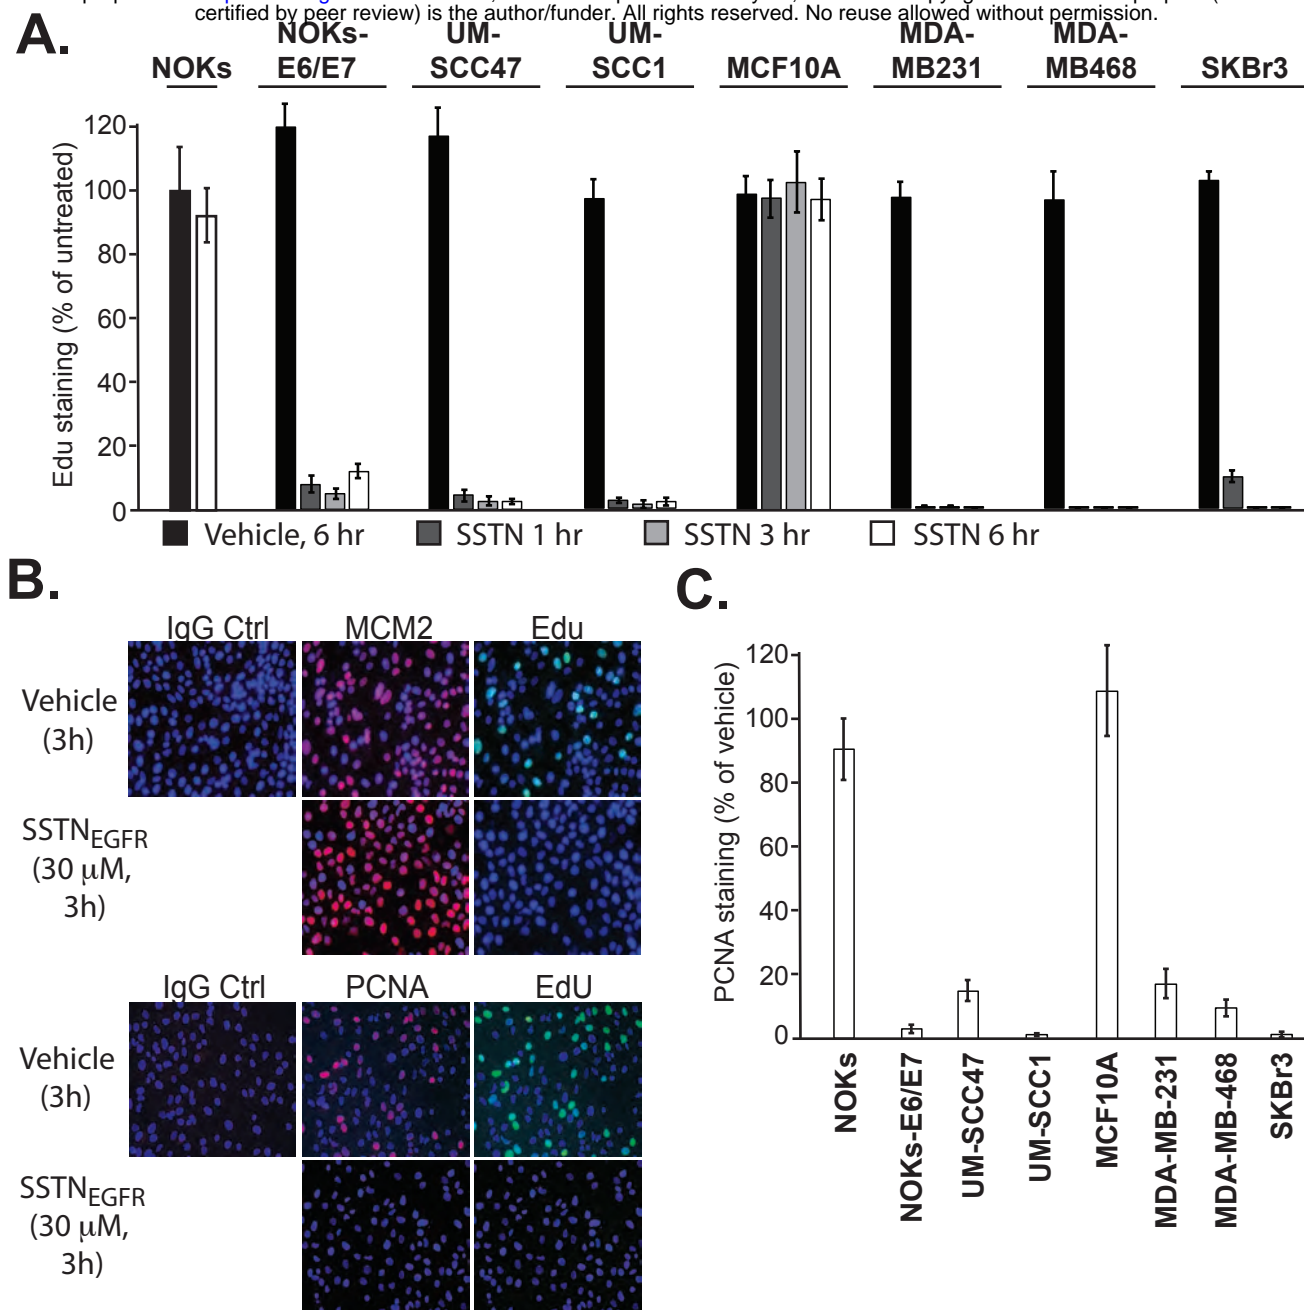

FIGURE 5. BEAUVAIS ET AL.

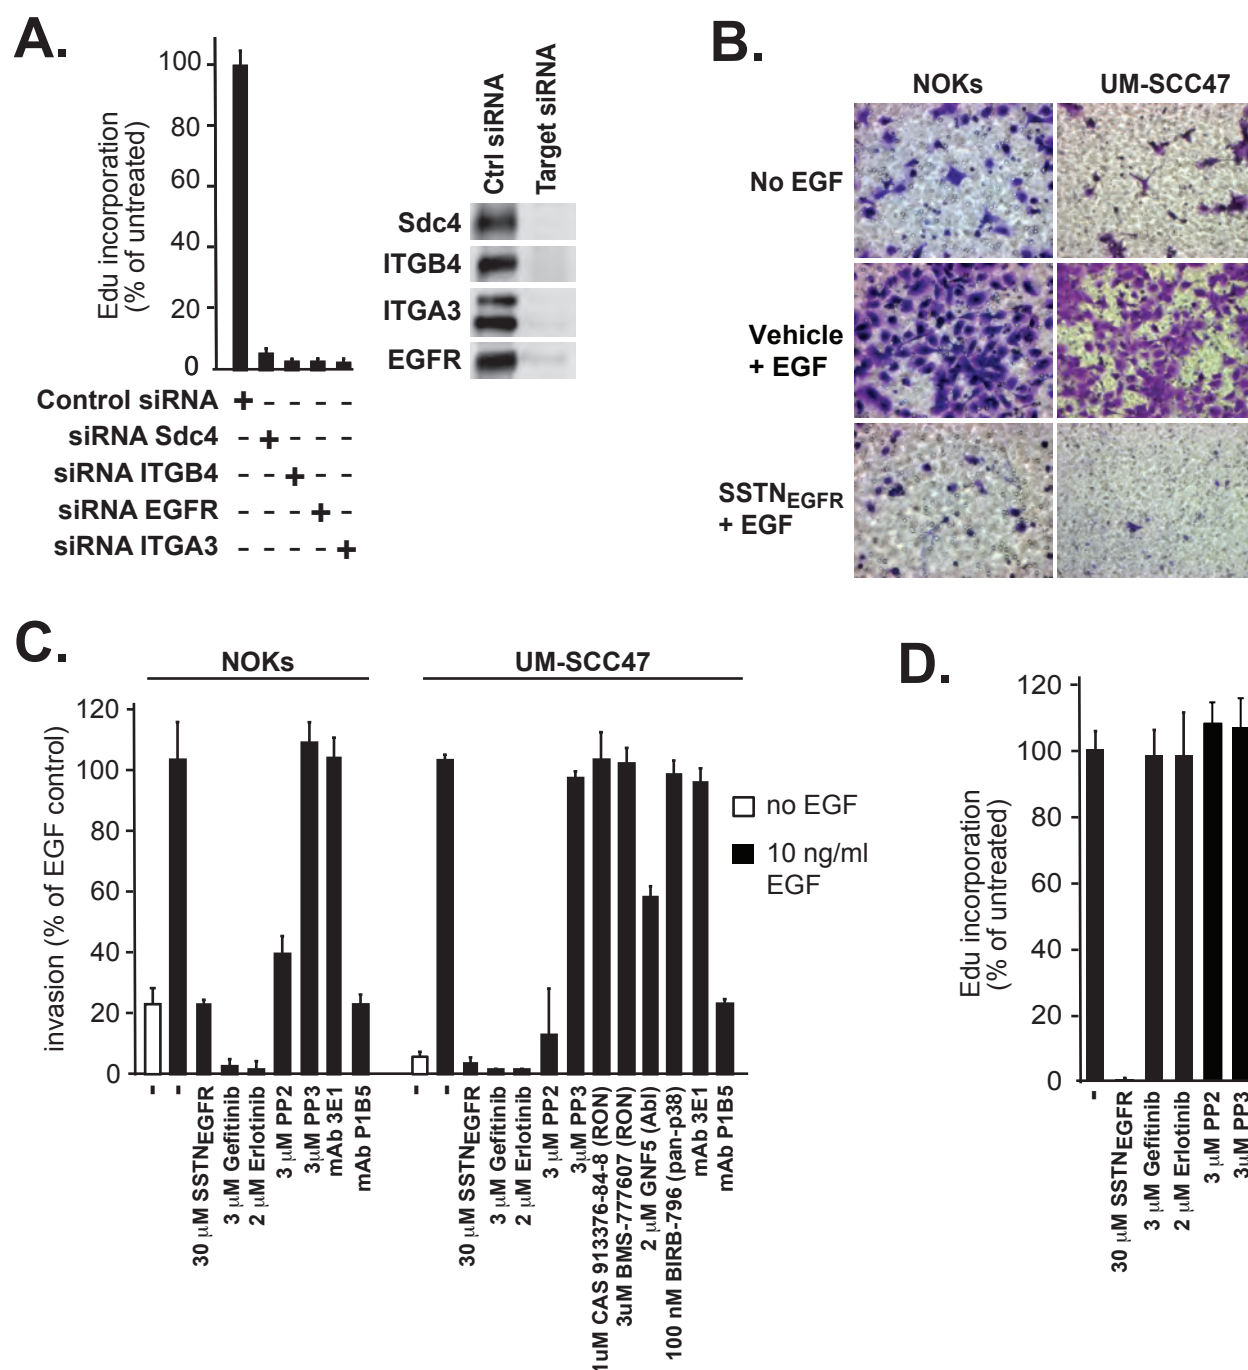

FIGURE 6. BEAUVAIS ET AL.



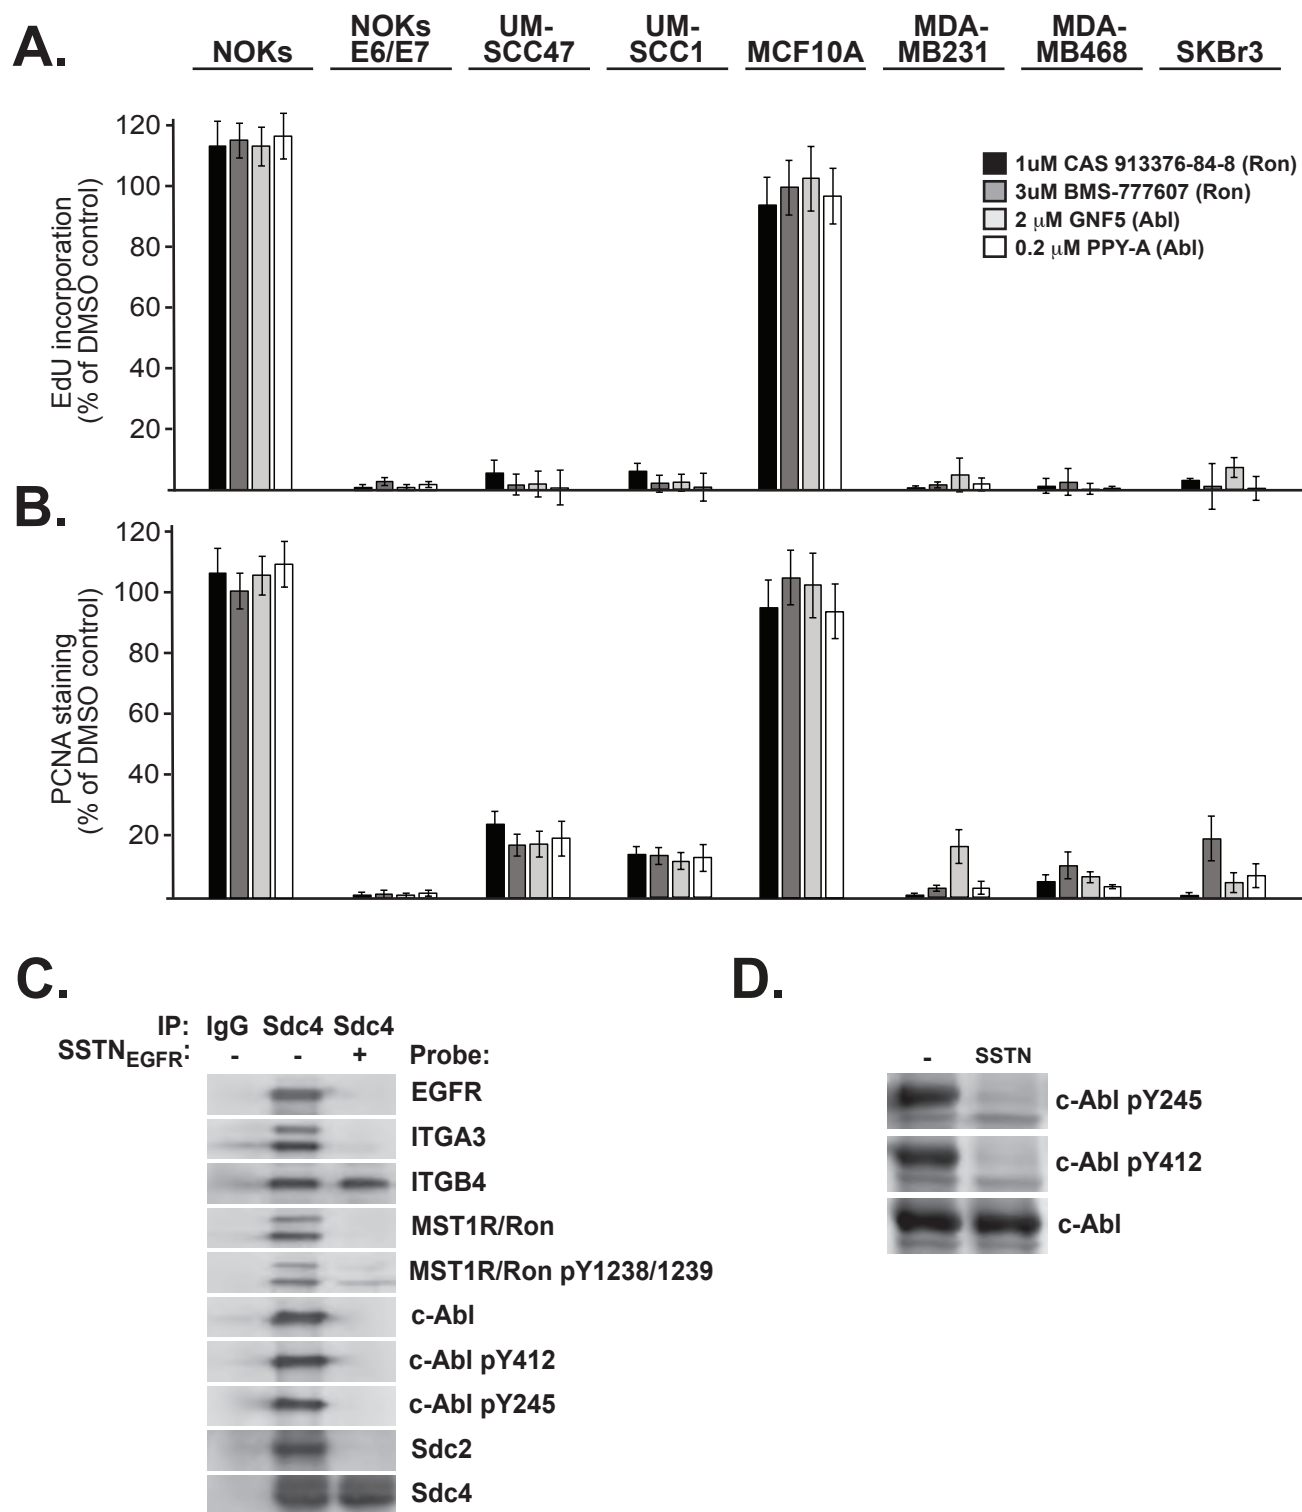

FIGURE 7. BEAUVAIS ET AL.

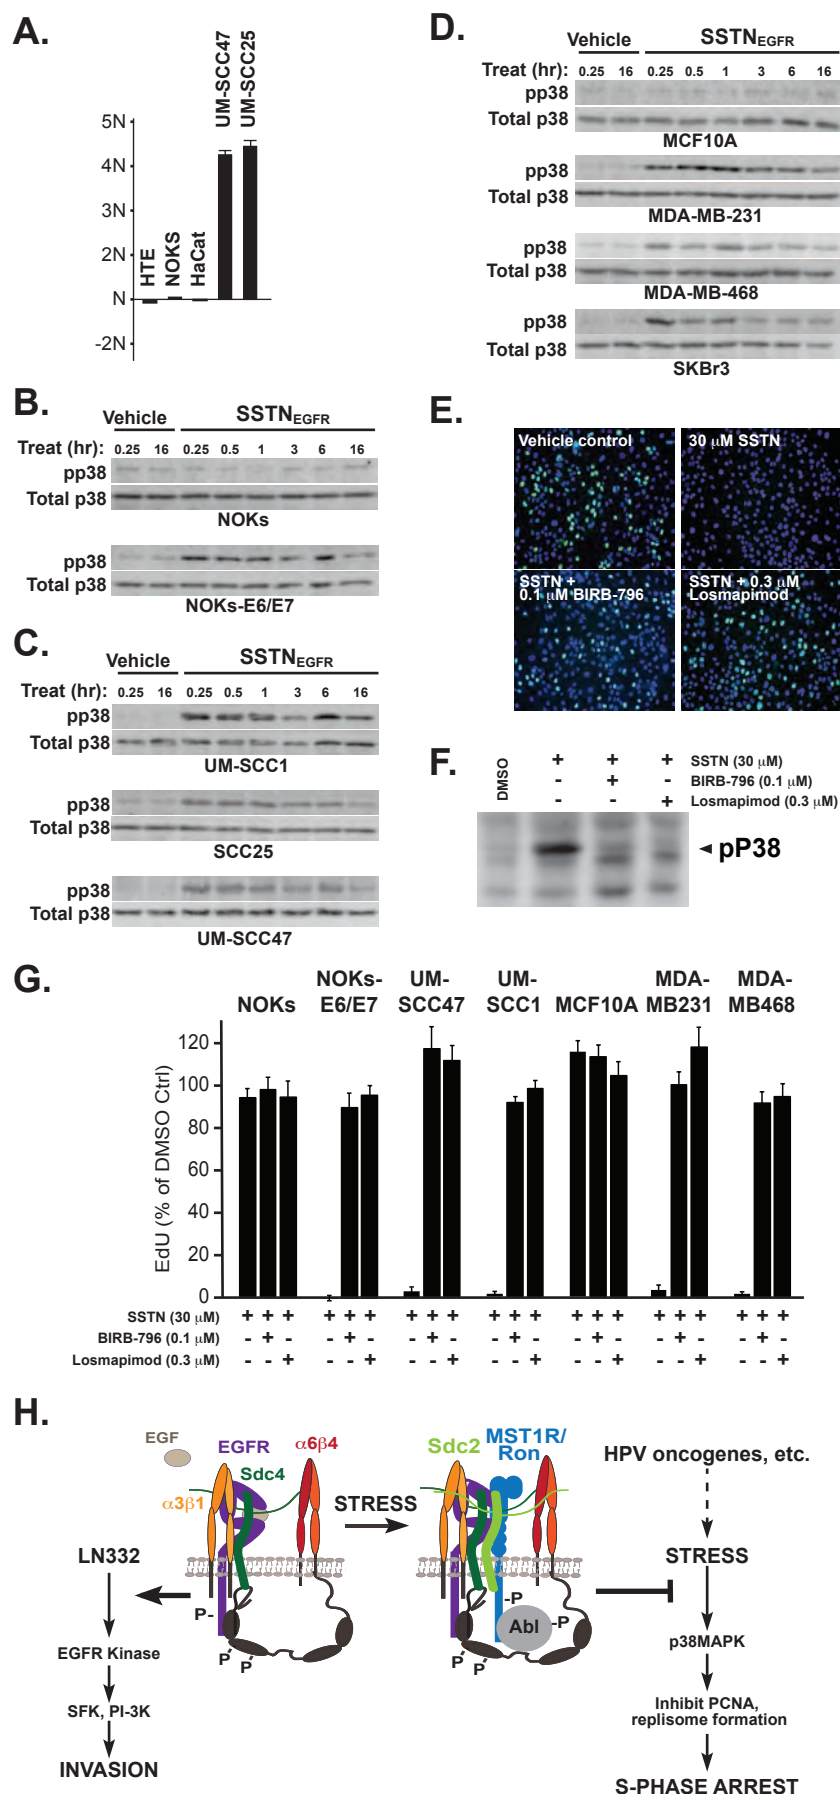

FIGURE 8. BEAUVAIS ET AL.
